# Supplementary material
Source: PubMed Central journal article supplement (PMC2678668)
Supplement: 0812346106_ST1_PDF.pdf [file 0812346106_ST1_PDF.pdf]

**Table S1. List of BL-induced genes in wild-type (WT) adult plants**

Microarray experiments and analyses are described in Materials and Methods. The overlaps with genes up- (green) or down- (purple) regulated in *herk1 the1* mutant are indicated. The cell wall genes implicated in cell elongation are highlighted.

| AGI                     | Annotation                                                     |
|-------------------------|----------------------------------------------------------------|
| AT5G51550               | phosphate-responsive 1 family protein                          |
| AT5G25190               | ethylene-responsive element-binding protein                    |
| AT1G29660               | GDSL-motif lipase                                              |
| AT2G19670               | protein arginine N-methyltransferase                           |
| AT5G22920               | zinc finger (C3HC4-type RING finger) family protein            |
| AT4G36110               | auxin-responsive protein                                       |
| AT5G57560               | xyloglucan:xyloglucosyl transferase (XTH22)                    |
| AT4G02330               | pectinesterase family protein                                  |
| AT3G07010               | pectate lyase family protein (PLL20)                           |
| AT2G28630               | beta-ketoacyl-CoA synthase family protein                      |
| AT1G54740               | expressed protein                                              |
| AT1G25550               | myb family transcription factor                                |
| AT5G64780               | expressed protein                                              |
| AT3G48100               | two-component responsive regulator                             |
| AT1G67470               | protein kinase family protein                                  |
| AT3G56880               | VQ motif-containing protein                                    |
| AT5G50915               | basic helix-loop-helix (bHLH) family protein                   |
| AT3G55980               | zinc finger (CCCH-type) family protein                         |
| AT3G03840               | auxin-responsive protein                                       |
| AT2G26710               | cytochrome P450                                                |
| AT5G40890               | chloride channel protein                                       |
| AT1G70290               | trehalose-6-phosphate synthase                                 |
| AT5G49450               | bZIP family transcription factor                               |
| AT5G64770               | expressed protein                                              |
| AT1G02860               | SPX (SYG1/Pho81/XPR1) domain-containing protein                |
| AT5G19120               | expressed protein                                              |
| AT2G40610               | expansin, putative (EXP8)                                      |
| AT4G38850               | auxin-responsive protein                                       |
| AT2G18700               | glycosyl transferase family 20 protein                         |
| AT5G47910               | respiratory burst oxidase protein D (RbohD)                    |
| AT4G23180               | receptor-like protein kinase 4                                 |
| AT1G51700               | Dof-type zinc finger domain-containing protein (ADOF1)         |
| AT1G78820 /// AT1G78830 | curculin-like (mannose-binding) lectin family protein          |
| AT3G16240               | delta tonoplast integral protein (delta-TIP)                   |
| AT3G50560               | short-chain dehydrogenase                                      |
| AT4G36540               | basic helix-loop-helix (bHLH) family protein                   |
| AT1G11260               | glucose transporter (STP1)                                     |
| AT1G80440               | kelch repeat-containing F-box family protein                   |
| AT2G20960               | expressed protein pEARLI 4 gene product                        |
| AT3G59080               | aspartyl protease family protein                               |
| AT1G27100               | expressed protein                                              |
| AT2G20670               | expressed protein                                              |
| AT1G13700               | glucosamine/galactosamine-6-phosphate isomerase family protein |
| AT2G44500               | expressed protein                                              |
| AT4G02075               | zinc finger (C3HC4-type RING finger) family protein            |
| AT3G48360               | speckle-type POZ protein-related                               |
| AT2G36220               | expressed protein                                              |
| AT5G41100               | expressed protein                                              |
| AT5G49360               | glycosyl hydrolase family 3 protein                            |
| AT2G17880               | DNAJ heat shock protein                                        |
| AT1G11050               | protein kinase family protein                                  |
| AT1G55330               | arabinogalactan-protein (AGP21)                                |
| AT1G18400               | basic helix-loop-helix (bHLH) family protein                   |
| AT2G27830               | expressed protein                                              |

|                         |                                                      |
|-------------------------|------------------------------------------------------|
| AT3G62930               | glutaredoxin family protein                          |
| AT2G22810               | 1-aminocyclopropane-1-carboxylate synthase 4         |
| AT5G65390               | arabinogalactan-protein (AGP7)                       |
| AT4G11280               | 1-aminocyclopropane-1-carboxylate synthase 6         |
| AT3G15540               | auxin-responsive protein                             |
| AT3G15450               | expressed protein                                    |
| AT2G21660               | glycine-rich RNA-binding protein (GRP7)              |
| AT4G16515               | expressed protein                                    |
| AT1G69490               | no apical meristem (NAM) family protein              |
| AT1G68840               | DNA-binding protein RAV2 (RAV2)                      |
| AT4G34138               | UDP-glucosyl transferase family protein              |
| AT3G14050               | RelA/SpoT protein                                    |
| AT3G15530               | expressed protein                                    |
| AT4G29950               | microtubule-associated protein                       |
| AT4G35750               | Rho-GTPase-activating protein-related                |
| AT2G44490               | glycosyl hydrolase family 1 protein                  |
| AT3G11650               | harpin-induced family protein                        |
| AT1G25400               | expressed protein                                    |
| AT4G10925               | F-box family protein                                 |
| AT1G10150               | expressed protein                                    |
| AT5G25170               | expressed protein                                    |
| AT4G33050               | calmodulin-binding family protein                    |
| AT2G19800               | expressed protein                                    |
| AT2G25735               | expressed protein                                    |
| AT3G12610               | DNA-damage-repair/toleration protein                 |
| AT1G19770               | purine permease-related                              |
| AT5G50570 /// AT5G50670 | squamosa promoter-binding protein                    |
| AT2G25900               | zinc finger (CCCH-type) family protein               |
| AT5G44070               | phytochelatin synthase 1 (PCS1)                      |
| AT1G54120               | expressed protein                                    |
| AT1G64760 /// AT2G19440 | glycosyl hydrolase family 17 protein                 |
| AT1G10550               | xyloglucan:xyloglucosyl transferase (XTH33)          |
| AT1G29460               | auxin-responsive protein                             |
| AT2G17040               | no apical meristem (NAM) family protein              |
| AT1G56510               | disease resistance protein                           |
| AT1G02660               | lipase class 3 family protein                        |
| AT2G38470               | WRKY family transcription factor                     |
| AT5G24570               | expressed protein                                    |
| AT3G62720               | galactosyl transferase GMA12                         |
| AT2G02710               | PAC motif-containing protein                         |
| AT1G55450               | embryo-abundant protein-related                      |
| AT3G16370               | GDSL-motif lipase                                    |
| AT1G07520               | scarecrow transcription factor                       |
| AT1G11380               | expressed protein                                    |
| AT4G18970               | GDSL-motif lipase                                    |
| AT2G40000               | expressed protein                                    |
| AT2G23810               | senescence-associated family protein                 |
| AT4G38400               | expansin family protein (EXPL2)                      |
| AT5G58120               | disease resistance protein                           |
| AT4G34160               | cyclin delta-3 (CYCD3)                               |
| AT5G02290               | protein kinase                                       |
| AT4G31050               | lipoyltransferase (LIP2p)                            |
| AT3G25900               | homocysteine S-methyltransferase 1 (HMT-1)           |
| AT1G29690               | expressed protein                                    |
| AT4G18340               | glycosyl hydrolase family 17 protein                 |
| AT1G80920               | DNAJ heat shock N-terminal domain-containing protein |
| AT3G55840               | expressed protein                                    |
| AT2G24550               | expressed protein                                    |
| AT1G76160               | multi-copper oxidase type I family protein           |
| AT4G27450               | unknown protein                                      |

|           |                                                             |
|-----------|-------------------------------------------------------------|
| AT3G07470 | expressed protein                                           |
| AT2G38400 | alanine--glyoxylate aminotransferase                        |
| AT4G22010 | multi-copper oxidase type I family protein                  |
| AT1G59910 | formin homology 2 domain-containing protein                 |
| AT4G14560 | auxin-responsive protein                                    |
| AT5G55970 | zinc finger (C3HC4-type RING finger) family protein         |
| AT1G15670 | kelch repeat-containing F-box family protein                |
| AT3G46600 | scarecrow transcription factor family protein               |
| AT5G15350 | plastocyanin-like domain-containing protein                 |
| AT3G15630 | expressed protein                                           |
| AT5G11070 | expressed protein                                           |
| AT4G17900 | zinc-binding family protein                                 |
| AT5G66920 | multi-copper oxidase type I family protein                  |
| AT5G41080 | Full-length cDNA Complete sequence                          |
| AT1G21010 | expressed protein                                           |
| AT1G29500 | auxin-responsive protein                                    |
| AT5G04190 | phytochrome kinase substrate-related                        |
| AT3G26510 | octicosapeptide/Phox/Bem1p (PB1) domain-containing protein  |
| AT1G66160 | U-box domain-containing protein                             |
| AT2G43290 | calmodulin-like protein (MSS3)                              |
| AT3G57450 | expressed protein                                           |
| AT1G19380 | expressed protein                                           |
| AT2G25200 | expressed protein                                           |
| AT2G24240 | potassium channel tetramerisation domain-containing protein |
| AT5G39840 | ATP-dependent RNA helicase, mitochondrial                   |
| AT1G28280 | VQ motif-containing protein                                 |
| AT5G59450 | scarecrow-like transcription factor 11 (SCL11)              |
| AT5G66210 | calcium-dependent protein kinase family protein             |
| AT4G08950 | phosphate-responsive protein                                |
| AT5G45340 | cytochrome P450 family protein                              |
| AT4G12420 | multi-copper oxidase, putative (SKU5)                       |
| AT3G45970 | expansin family protein (EXPL1)                             |
| AT3G58120 | bZIP transcription factor family protein                    |
| AT3G52840 | beta-galactosidase, putative                                |
| AT3G01650 | copine-related                                              |
| AT5G67450 | zinc finger (C2H2 type) protein 1 (AZF1)                    |
| AT1G05575 | expressed protein                                           |
| AT3G04640 | glycine-rich protein                                        |
| AT1G21120 | O-methyltransferase                                         |
| AT3G49530 | no apical meristem (NAM) family protein                     |
| AT1G74670 | gibberellin-responsive protein                              |
| AT3G02170 | expressed protein                                           |
| AT1G80280 | hydrolase, alpha                                            |
| AT1G11545 | XTH8                                                        |
| AT1G76110 | high mobility group (HMG1/2) family protein                 |
| AT2G23320 | WRKY family transcription factor                            |
| AT5G61440 | thioredoxin family protein                                  |
| AT5G20110 | dynein light chain                                          |
| AT2G06850 | XTH4                                                        |
| AT3G57530 | calcium-dependent protein kinase                            |
| AT5G45750 | Ras-related GTP-binding protein                             |
| AT3G45640 | mitogen-activated protein kinase, putative                  |
| AT4G37610 | TAZ zinc finger family protein                              |
| AT5G14730 | expressed protein                                           |
| AT3G62550 | universal stress protein (USP) family protein               |
| AT3G05200 | zinc finger (C3HC4-type RING finger) family protein (ATL6)  |
| AT1G79700 | ovule development protein                                   |
| AT1G21830 | expressed protein                                           |
| AT1G49840 | expressed protein                                           |
| AT5G24590 | turnip crinkle virus-interacting protein                    |

|                         |                                                                        |
|-------------------------|------------------------------------------------------------------------|
| AT2G18010               | auxin-responsive family protein                                        |
| AT5G41740 /// AT5G41750 | disease resistance protein (TIR-NBS-LRR class)                         |
| AT5G20250               | raffinose synthase family protein                                      |
| AT1G59590               | expressed protein                                                      |
| AT4G28780               | GDSL-motif lipase                                                      |
| AT5G58430               | exocyst subunit EXO70 family protein leucine zipper-containing protein |
| AT1G68330               | expressed protein                                                      |
| AT3G29035               | no apical meristem (NAM) family protein                                |
| AT1G07135               | unknown protein                                                        |
| AT5G61210               | SNAP25 homologous protein                                              |
| AT1G72060               | expressed protein                                                      |
| AT3G21780               | UDP-glucosyl transferase family protein                                |
| AT4G02410               | lectin protein kinase family protein                                   |
| AT3G61060               | F-box family protein                                                   |
| AT5G57220               | cytochrome P450                                                        |
| AT2G30930               | expressed protein                                                      |
| AT5G44060               | expressed protein                                                      |
| AT5G39580               | peroxidase                                                             |
| AT3G28200               | peroxidase                                                             |
| AT5G25280               | serine-rich protein-related                                            |
| AT5G48450               | multi-copper oxidase type I family protein                             |
| AT5G24580               | copper-binding family protein                                          |
| AT2G37950               | zinc finger (C3HC4-type RING finger) family protein                    |
| AT4G23400               | major intrinsic family protein                                         |
| AT2G40140               | zinc finger (CCCH-type) family protein                                 |
| AT1G24140               | matrixin family protein                                                |
| AT2G26560               | patatin                                                                |
| AT4G19420               | pectinacetylerase family protein                                       |
| AT1G64380               | AP2 domain-containing transcription factor                             |
| AT1G12780               | UDP-glucose 4-epimerase                                                |
| AT1G32920               | expressed protein                                                      |
| AT5G59550               | zinc finger (C3HC4-type RING finger) family protein                    |
| AT4G09890               | expressed protein                                                      |
| AT1G78850 /// AT1G78860 | curculin-like (mannose-binding) lectin family protein                  |
| AT5G47560               | sodium/dicarboxylate cotransporter                                     |
| AT3G52400               | syntaxin                                                               |
| AT1G77210               | sugar transporter                                                      |
| AT4G34150               | C2 domain-containing protein                                           |
| <b>AT4G30290</b>        | <b>XTH19</b>                                                           |
| AT3G19930               | sugar transport protein (STP4)                                         |
| AT4G31550               | WRKY family transcription factor                                       |
| AT5G02020               | expressed protein                                                      |
| AT1G53730               | leucine-rich repeat transmembrane protein kinase                       |
| AT1G30690               | SEC14 cytosolic factor family protein                                  |
| AT4G20000               | VQ motif-containing protein                                            |
| AT1G52830               | auxin-responsive protein                                               |
| AT4G32060               | calcium-binding EF hand family protein                                 |
| AT4G24800               | MA3 domain-containing protein                                          |
| AT2G35710               | glycogenin glucosyltransferase                                         |
| AT3G13450               | 2-oxoisovalerate dehydrogenase                                         |
| AT5G18060               | auxin-responsive protein                                               |
| AT1G24150               | formin homology 2 domain-containing protein                            |
| AT3G26980               | ubiquitin family protein                                               |
| AT5G06690               | thioredoxin family protein                                             |
| AT5G52900               | expressed protein                                                      |
| AT4G03510               | zinc finger (C3HC4-type RING finger) family protein (RMA1)             |
| AT4G22780               | ACT domain-containing protein (ACR7)                                   |
| AT2G37430               | zinc finger (C2H2 type) family protein (ZAT11)                         |
| AT2G26530               | expressed protein                                                      |
| AT1G15580               | auxin-responsive protein                                               |

|                         |                                                            |
|-------------------------|------------------------------------------------------------|
| AT2G47060               | serine/threonine protein kinase                            |
| AT5G15870               | glycosyl hydrolase family 81 protein                       |
| AT1G63750               | disease resistance protein (TIR-NBS-LRR class)             |
| AT5G43700               | auxin-responsive protein                                   |
| AT2G16280               | very-long-chain fatty acid condensing enzyme               |
| AT5G64330               | non-phototropic hypocotyl 3 (NPH3)                         |
| AT5G46780               | VQ motif-containing protein                                |
| AT3G12630               | zinc finger (AN1-like) family protein                      |
| AT5G44680               | methyladenine glycosylase family protein                   |
| AT2G46330               | arabinogalactan-protein (AGP16)                            |
| AT4G12510 /// AT4G12520 | protease inhibitor                                         |
| AT1G28600               | lipase                                                     |
| AT2G35880               | expressed protein                                          |
| AT5G42830               | transferase family protein                                 |
| AT2G41640               | expressed protein                                          |
| AT2G26190               | calmodulin-binding family protein                          |
| AT3G02800               | tyrosine specific protein phosphatase family protein       |
| AT5G04870               | calcium-dependent protein kinase isoform AK1               |
| AT2G03350               | expressed protein contains                                 |
| AT5G56870               | beta-galactosidase, putative                               |
| AT1G69890               | expressed protein                                          |
| AT1G27770               | calcium-transporting ATPase 1, plasma membrane-type        |
| AT2G32530 /// AT2G32540 | cellulose synthase family protein                          |
| AT2G36410               | expressed protein contains                                 |
| AT5G47330               | palmitoyl protein thioesterase family protein              |
| AT1G28330               | dormancy-associated protein, putative (DRM1)               |
| AT3G26320               | cytochrome P450 71B36                                      |
| AT1G49200               | zinc finger (C3HC4-type RING finger) family protein        |
| AT1G64640               | plastocyanin-like domain-containing protein                |
| AT5G46910               | transcription factor jumonji (jmj) family protein          |
| AT5G16590               | leucine-rich repeat transmembrane protein kinase, putative |
| AT4G11300               | expressed protein                                          |
| AT1G76600               | expressed protein                                          |
| AT5G12420               | expressed protein                                          |
| AT5G45670               | GDSL-motif lipase                                          |
| AT1G61350               | armadillo/beta-catenin repeat family protein               |
| AT2G34510               | expressed protein                                          |
| AT5G65810               | expressed protein                                          |
| AT3G16720               | zinc finger (C3HC4-type RING finger) family protein        |
| AT5G47230               | ethylene-responsive element-binding factor 5 (ERF5)        |
| AT1G75780               | tubulin beta-1 chain (TUB1)                                |
| AT2G36690               | oxidoreductase, 2OG-Fe(II) oxygenase family protein        |
| AT5G44020               | acid phosphatase class B family protein                    |
| AT1G49210               | zinc finger (C3HC4-type RING finger) family protein        |
| AT2G36400               | expressed protein                                          |
| AT2G41010               | VQ motif-containing protein                                |
| AT4G39830               | L-ascorbate oxidase                                        |
| AT5G09820               | plastid-lipid associated protein PAP                       |
| AT5G02160               | expressed protein                                          |
| AT2G32800               | protein kinase family protein                              |
| AT2G27050               | ethylene-insensitive3-like1 (EIL1)                         |
| AT1G75020               | phospholipid/glycerol acyltransferase family protein       |
| AT3G50830               | stress-responsive protein                                  |
| AT1G03590               | protein phosphatase 2C family protein                      |
| AT4G02380               | late embryogenesis abundant 3 family protein               |
| AT1G06840               | leucine-rich repeat transmembrane protein kinase           |
| AT4G24570               | mitochondrial substrate carrier family protein             |
| AT2G44130               | kelch repeat-containing F-box family protein               |
| AT1G23710               | expressed protein                                          |
| AT5G22690               | disease resistance protein (TIR-NBS-LRR class)             |

|                         |                                                                |
|-------------------------|----------------------------------------------------------------|
| AT4G18880               | heat shock transcription factor 21 (HSF21)                     |
| AT5G04770               | amino acid permease family protein                             |
| AT4G38550               | expressed protein                                              |
| AT2G41430               | dehydration-induced protein (ERD15)                            |
| AT2G14890               | arabinogalactan-protein (AGP9)                                 |
| AT2G44370               | DC1 domain-containing protein                                  |
| AT3G17770               | dihydroxyacetone kinase family protein                         |
| AT5G42250               | alcohol dehydrogenase                                          |
| AT5G04040               | patatin-related                                                |
| AT5G24490               | 30S ribosomal protein                                          |
| AT3G27390               | expressed protein                                              |
| AT1G14370               | protein kinase (APK2a)                                         |
| AT4G39070               | zinc finger (B-box type) family protein salt-tolerance protein |
| AT2G03710               | MADS-box protein (AGL3)                                        |
| AT1G72150               | SEC14 cytosolic factor family protein                          |
| AT2G20180               | basic helix-loop-helix (bHLH) family protein                   |
| AT5G38850               | disease resistance protein (TIR-NBS-LRR class)                 |
| AT5G57655               | xylose isomerase family protein                                |
| AT1G21110 /// AT1G21120 | O-methyltransferase                                            |
| AT5G37260               | myb family transcription factor                                |
| AT3G25600               | calmodulin                                                     |
| AT4G35770               | senescence-associated protein (SEN1)                           |
| AT4G05070               | expressed protein                                              |
| AT3G50950               | disease resistance protein (CC-NBS-LRR class)                  |
| AT4G23240               | protein kinase family protein                                  |
| AT1G56720               | protein kinase                                                 |
| AT3G26910               | hydroxyproline-rich glycoprotein family protein                |
| AT1G08980               | amidase family protein                                         |
| AT4G20260               | DREPP plasma membrane polypeptide family protein               |
| AT2G33570               | expressed protein                                              |
| AT1G20823               | zinc finger (C3HC4-type RING finger) family protein            |
| AT1G67910               | expressed protein                                              |
| AT5G05190               | expressed protein                                              |
| AT3G13520               | arabinogalactan-protein (AGP12)                                |
| AT5G48460               | fimbrin-like protein                                           |
| AT1G61900               | expressed protein                                              |
| AT5G14120               | nodulin family protein                                         |
| AT3G62110               | glycoside hydrolase family 28 protein                          |
| AT1G59870               | ABC transporter family protein                                 |
| AT3G04210               | disease resistance protein (TIR-NBS class)                     |
| AT1G04240               | auxin-responsive protein                                       |
| AT5G37770               | touch-responsive protein                                       |
| AT5G47550               | cysteine protease inhibitor, putative                          |
| AT3G29670               | transferase family protein                                     |
| AT3G17510               | CBL-interacting protein kinase 1 (CIPK1)                       |
| AT3G28460               | expressed protein                                              |
| AT4G11360               | zinc finger (C3HC4-type RING finger) family protein            |
| AT1G70520               | protein kinase family protein                                  |
| AT4G09460               | myb family transcription factor                                |
| AT4G31800               | WRKY family transcription factor                               |
| AT4G03340               | glycosyltransferase family 14 protein                          |
| AT3G23750               | leucine-rich repeat family protein                             |
| AT1G03090               | methylcrotonyl-CoA carboxylase alpha chain, mitochondrial      |
| AT1G49620               | kip-related protein 7 (KRP7)                                   |
| AT2G45400               | dihydroflavonol 4-reductase family                             |
| AT5G26740               | expressed protein                                              |
| AT1G21920               | MORN repeat-containing protein                                 |
| AT1G70560               | alliinase C-terminal domain-containing protein                 |
| AT5G03520               | Full-length cDNA Complete sequence                             |
| AT3G10640               | SNF7 family protein                                            |



|           |                                                              |
|-----------|--------------------------------------------------------------|
| AT1G01540 | protein kinase family protein                                |
| AT3G07340 | basic helix-loop-helix (bHLH) family protein                 |
| AT1G14290 | acid phosphatase                                             |
| AT4G36670 | mannitol transporter                                         |
| AT1G24170 | glycosyl transferase family 8 protein                        |
| AT3G15760 | expressed protein                                            |
| AT4G14500 | expressed protein                                            |
| AT1G64670 | hydrolase, alpha                                             |
| AT3G62420 | bZIP transcription factor family protein                     |
| AT1G09460 | glucan endo-1,3-beta-glucosidase-related                     |
| AT1G22530 | SEC14 cytosolic factor family protein                        |
| AT2G26980 | CBL-interacting protein kinase 3 (CIPK3)                     |
| AT1G65310 | XTH17                                                        |
| AT1G70420 | expressed protein                                            |
| AT1G27960 | expressed protein                                            |
| AT3G55450 | protein kinase                                               |
| AT1G74450 | expressed protein                                            |
| AT2G34770 | fatty acid hydroxylase (FAH1)                                |
| AT1G16130 | wall-associated kinase                                       |
| AT3G57040 | two-component responsive regulator                           |
| AT1G21100 | O-methyltransferase, putative                                |
| AT3G62660 | glycosyl transferase family 8 protein                        |
| AT5G52830 | WRKY family transcription factor                             |
| AT2G29340 | short-chain dehydrogenase                                    |
| AT5G41050 | expressed protein                                            |
| AT2G35710 | glycogenin glucosyltransferase                               |
| AT2G39260 | MIF4G domain-containing protein                              |
| AT5G49170 | expressed protein                                            |
| AT5G35330 | methyl-CpG-binding domain-containing protein                 |
| AT5G05090 | myb family transcription factor                              |
| AT3G52480 | expressed protein                                            |
| AT1G20190 | expansin, putative (EXP11)                                   |
| AT5G54630 | zinc finger protein-related                                  |
| AT3G28180 | glycosyl transferase family 2 protein                        |
| AT5G26920 | calmodulin-binding protein                                   |
| AT3G46940 | deoxyuridine 5'-triphosphate nucleotidohydrolase             |
| AT2G44080 | expressed protein                                            |
| AT1G67310 | calmodulin-binding protein                                   |
| AT4G23220 | protein kinase                                               |
| AT1G03850 | glutaredoxin family protein                                  |
| AT3G47160 | expressed protein                                            |
| AT2G29300 | tropinone reductase, putative                                |
| AT1G30370 | lipase class 3 family protein                                |
| AT1G22550 | proton-dependent oligopeptide transport (POT) family protein |
| AT5G55700 | glycosyl hydrolase family 14 protein                         |
| AT1G58420 | expressed protein                                            |
| AT1G14540 | anionic peroxidase, putative                                 |
| AT1G27090 | glycine-rich protein                                         |
| AT4G28310 | expressed protein                                            |
| AT5G23130 | peptidoglycan-binding LysM domain-containing protein         |
| AT2G37940 | expressed protein                                            |
| AT5G64310 | arabinogalactan-protein (AGP1)                               |
| AT4G37240 | expressed protein                                            |
| AT1G23870 | glycosyl transferase family 20 protein                       |
| AT1G68670 | myb family transcription factor                              |
| AT2G31880 | leucine-rich repeat transmembrane protein kinase, putative   |
| AT1G72900 | disease resistance protein (TIR-NBS class)                   |
| AT3G15060 | Ras-related GTP-binding family protein                       |
| AT1G09570 | phytochrome A (PHYA)                                         |
| AT4G09640 | expressed protein                                            |

|                                      |                                                               |
|--------------------------------------|---------------------------------------------------------------|
| AT1G07160                            | protein phosphatase 2C, putative                              |
| AT2G03730                            | ACT domain-containing protein (ACR5)                          |
| AT4G36550                            | U-box domain-containing protein                               |
| AT2G32150                            | haloacid dehalogenase-like hydrolase family protein           |
| AT1G09160                            | protein phosphatase 2C-related                                |
| AT5G17300                            | myb family transcription factor                               |
| AT1G66090                            | disease resistance protein (TIR-NBS class)                    |
| AT1G31350                            | F-box family protein                                          |
| AT1G66180                            | aspartyl protease family protein                              |
| AT4G15750                            | invertase/pectin methylesterase inhibitor family protein      |
| AT2G45170                            | autophagy 8e (APG8e)                                          |
| AT2G43200                            | dehydration-responsive family protein                         |
| AT1G12500                            | phosphate translocator-related                                |
| AT1G27200                            | expressed protein                                             |
| AT1G30360                            | early-responsive to dehydration stress protein (ERD4)         |
| AT2G30600                            | BTB/POZ domain-containing protein                             |
| AT4G20380                            | zinc finger protein (LSD1)                                    |
| AT1G27290                            | expressed protein                                             |
| AT5G64090                            | expressed protein                                             |
| AT2G15580                            | zinc finger (C3HC4-type RING finger) family protein           |
| AT4G28400                            | protein phosphatase 2C, putative                              |
| AT2G33580                            | protein kinase family protein                                 |
| AT5G03120                            | expressed protein                                             |
| AT1G48570                            | zinc finger (Ran-binding) family protein                      |
| AT1G10740                            | expressed protein                                             |
| AT5G59070                            | glycosyl transferase family 1 protein                         |
| AT3G24530                            | AAA-type ATPase family protein                                |
| AT4G00950                            | expressed protein                                             |
| AT1G27170 /// AT1G27180              | disease resistance protein (TIR-NBS-LRR class)                |
| AT4G26610                            | protein kinase                                                |
| AT3G49350                            | RabGAP/TBC domain-containing protein                          |
| AT3G59940 /// AT3G59950              | kelch repeat-containing F-box family protein                  |
| AT1G65390                            | disease resistance protein (TIR class)                        |
| AT2G28450                            | zinc finger (CCCH-type) family protein                        |
| AT5G66490                            | expressed protein                                             |
| AT3G24350                            | syntaxin                                                      |
| AT2G39650                            | expressed protein                                             |
| AT2G34650                            | protein kinase PINOID (PID)                                   |
| AT2G41560                            | calcium-transporting ATPase 4, plasma membrane-type           |
| AT1G61100                            | disease resistance protein (TIR class)                        |
| AT1G64980                            | expressed protein                                             |
| AT3G22060                            | receptor protein kinase-related                               |
| AT4G17245                            | zinc finger (C3HC4-type RING finger) family protein           |
| AT1G15890                            | disease resistance protein (CC-NBS-LRR class)                 |
| AT1G74870                            | expressed protein                                             |
| AT3G49220                            | pectinesterase family protein                                 |
| AT1G42990                            | bZIP transcription factor family protein                      |
| AT4G24670                            | alliinase family protein                                      |
| AT4G26670                            | mitochondrial import inner membrane translocase subunit Tim17 |
| AT2G01300                            | expressed protein                                             |
| AT4G15975                            | zinc finger (C3HC4-type RING finger) family protein           |
| AT1G07920 /1G07930 /1G07940 /5G60390 | elongation factor 1-alpha                                     |
| AT2G28305                            | expressed protein                                             |
| AT2G33830                            | dormancy/auxin associated family protein                      |
| AT1G33590                            | disease resistance protein-related                            |
| AT5G46080                            | protein kinase family protein                                 |
| AT2G31270                            | hydroxyproline-rich glycoprotein family protein               |
| AT1G09575                            | expressed protein                                             |
| AT1G49600                            | RNA-binding protein 47 (RBP47)                                |



|                                      |                                                               |
|--------------------------------------|---------------------------------------------------------------|
| AT4G23270                            | protein kinase family protein                                 |
| AT2G19460                            | expressed protein                                             |
| AT2G34500                            | cytochrome P450 family protein                                |
| AT5G43760                            | beta-ketoacyl-CoA synthase                                    |
| AT5G54380                            | protein kinase family protein                                 |
| AT5G16650                            | heat shock protein binding / unfolded protein                 |
| AT4G15920                            | nodulin MtN3 family protein                                   |
| AT4G23190                            | protein kinase family protein                                 |
| AT3G19030                            | expressed protein                                             |
| AT1G14480                            | ankyrin repeat family protein                                 |
| AT1G20020                            | ferredoxin--NADP(+) reductase, putative                       |
| AT3G59110                            | protein kinase family protein                                 |
| AT3G13750                            | beta-galactosidase, putative                                  |
| AT5G39660                            | Dof-type zinc finger domain-containing protein                |
| AT3G61260                            | DNA-binding family protein                                    |
| AT5G46260 /// AT5G46490              | disease resistance protein (TIR-NBS-LRR class)                |
| AT3G47570                            | leucine-rich repeat transmembrane protein kinase              |
| AT1G71880                            | sucrose transporter                                           |
| AT5G52750                            | heavy-metal-associated domain-containing protein              |
| AT1G12220                            | disease resistance protein RPS5 (CC-NBS-LRR class)            |
| AT1G16390                            | organic cation transporter-related                            |
| AT1G57980 /// AT1G57990              | purine permease-related                                       |
| AT2G30600                            | BTB/POZ domain-containing protein                             |
| AT3G17230                            | invertase/pectin methylesterase inhibitor family protein      |
| AT3G52190                            | transducin family protein                                     |
| AT5G51390                            | expressed protein                                             |
| AT3G18560                            | expressed protein                                             |
| AT5G63810                            | beta-galactosidase, putative                                  |
| AT5G05550                            | expressed protein                                             |
| AT3G53810                            | lectin protein kinase                                         |
| AT5G60690                            | homeodomain-leucine zipper protein Revoluta (REV)             |
| AT2G05050 /2G30020 /3G27140 /4G08260 | pseudogene, protein phosphatase 2C                            |
| AT2G30250                            | WRKY family transcription factor                              |
| AT3G03830                            | auxin-responsive protein                                      |
| AT5G20230                            | plastocyanin-like domain-containing protein                   |
| AT3G29240                            | expressed protein                                             |
| AT2G22830                            | squalene monooxygenase, putative                              |
| AT5G61590                            | AP2 domain-containing transcription factor family protein     |
| AT3G28340                            | galactinol synthase, putative                                 |
| AT5G02010                            | expressed protein                                             |
| AT5G14105                            | expressed protein                                             |
| AT1G30250                            | expressed protein                                             |
| AT2G39800 /// AT3G55610              | delta 1-pyrroline-5-carboxylate synthetase A                  |
| AT5G66200                            | armadillo/beta-catenin repeat family protein                  |
| AT4G31590                            | glycosyl transferase family 2 protein                         |
| AT1G29440                            | auxin-responsive family protein                               |
| AT5G10695 /// AT5G10700              | expressed protein                                             |
| AT4G24160                            | hydrolase, alpha                                              |
| AT3G10930                            | expressed protein                                             |
| AT2G33330                            | 33 kDa secretory protein-related                              |
| AT3G45960                            | expansin family protein (EXPL3)                               |
| AT4G18710                            | shaggy-related protein kinase                                 |
| AT2G30500                            | kinase interacting family protein                             |
| AT3G16850                            | glycoside hydrolase family 28 protein                         |
| AT5G06550                            | transcription factor jumonji (jmjC) domain-containing protein |
| AT5G61600                            | ethylene-responsive element-binding family protein            |
| AT4G28270                            | zinc finger (C3HC4-type RING finger) family protein           |
| AT1G14685                            | expressed protein                                             |
| AT1G60080                            | 3' exoribonuclease family domain 1-containing protein         |

|                         |                                                              |
|-------------------------|--------------------------------------------------------------|
| AT2G29670               | expressed protein                                            |
| AT3G02130               | leucine-rich repeat transmembrane protein kinase             |
| AT2G19810               | zinc finger (CCCH-type) family protein                       |
| AT5G19770 /// AT5G19780 | tubulin alpha-3/alpha-5 chain (TUA3)                         |
| AT1G73830               | basic helix-loop-helix (bHLH) family protein                 |
| AT1G33600               | leucine-rich repeat family protein                           |
| AT5G64830               | programmed cell death 2 C-terminal domain-containing protein |
| AT1G75180               | expressed protein                                            |
| AT3G55280               | 60S ribosomal protein L23A                                   |
| AT4G20780               | calcium-binding protein                                      |
| AT3G13430               | zinc finger (C3HC4-type RING finger) family protein          |
| AT1G69430               | hypothetical protein                                         |
| AT5G67420               | LOB domain protein 37                                        |
| AT5G18490               | expressed protein                                            |
| AT4G36040               | DNAJ heat shock N-terminal domain-containing protein (J11)   |
| AT3G12700               | aspartyl protease family protein                             |
| AT5G60680               | expressed protein                                            |
| AT3G23730               | XTH16                                                        |
| AT5G46710               | zinc-binding family protein                                  |
| AT1G73500               | mitogen-activated protein kinase kinase (MAPKK)              |
| AT4G32410               | cellulose synthase, catalytic subunit                        |
| AT3G18690               | VQ motif-containing protein                                  |
| AT2G34300               | dehydration-responsive protein-related                       |
| AT1G27460               | calmodulin-binding protein                                   |
| AT1G01120               | fatty acid elongase 3-ketoacyl-CoA synthase 1 (KCS1)         |
| AT4G30200               | expressed protein                                            |
| AT3G06450               | anion exchange family protein                                |
| AT4G04700               | calcium-dependent protein kinase, putative                   |

---
