# Supplementary material
Source: PubMed Central journal article supplement (PMC2678668)
Supplement: 0812346106_ST2_PDF.pdf [file 0812346106_ST2_PDF.pdf]

**Table S2. List of BL-repressed genes in wild-type (WT) adult plants**

Microarray experiments and analyses are described in Materials and Methods. The overlaps with genes up- (blue) or down- (red) regulated in *herk1 the1* mutant are indicated.

| AGI                            | Annotation                                                           |
|--------------------------------|----------------------------------------------------------------------|
| AT1G32190                      | expressed protein                                                    |
| AT5G59030                      | copper transporter 1 (COPT1)                                         |
| AT3G51440                      | strictosidine synthase family protein                                |
| AT5G22820                      | expressed protein                                                    |
| AT4G01570                      | pentatricopeptide (PPR) repeat-containing protein                    |
| AT2G46830                      | myb-related transcription factor (CCA1)                              |
| AT5G63030                      | glutaredoxin                                                         |
| AT4G17830                      | peptidase M20                                                        |
| AT1G70550                      | expressed protein                                                    |
| AT4G01290                      | expressed protein                                                    |
| AT5G28650                      | WRKY family transcription factor                                     |
| AT5G51840                      | expressed protein                                                    |
| AT5G03130                      | hypothetical protein                                                 |
| <b>AT3G44490 /// AT3G44660</b> | <b>histone deacetylase-related</b>                                   |
| AT5G42760                      | O-methyltransferase N-terminus domain-containing protein             |
| AT4G21960                      | peroxidase 42                                                        |
| AT1G28420                      | homeobox transcription factor                                        |
| AT1G23030                      | armadillo/beta-catenin repeat family protein                         |
| AT5G55930                      | oligopeptide transporter OPT family protein                          |
| AT2G42280                      | basic helix-loop-helix (bHLH) family protein                         |
| AT3G26290                      | cytochrome P450 71B26, putative                                      |
| AT5G55390                      | hydroxyproline-rich glycoprotein family protein                      |
| AT4G14615                      | expressed protein                                                    |
| AT1G54115                      | cation exchanger, putative                                           |
| AT3G08590                      | 2,3-biphosphoglycerate-independent phosphoglycerate mutase, putative |
| AT2G40830                      | zinc finger (C3HC4-type RING finger) family protein                  |
| AT5G51830                      | pfkB-type carbohydrate kinase family protein                         |
| <b>AT5G23020</b>               | <b>MAM-L mRNA, complete cds.</b>                                     |
| AT1G14530                      | tobamovirus multiplication protein 3, putative                       |
| AT1G70790                      | C2 domain-containing protein                                         |
| AT2G35010                      | thioredoxin family protein                                           |
| AT2G35620                      | leucine-rich repeat transmembrane protein kinase                     |
| <b>AT3G25760 /// AT3G25770</b> | <b>early-responsive to dehydration stress protein (ERD12)</b>        |
| AT4G15120                      | VQ motif-containing protein                                          |
| AT4G28600                      | calmodulin-binding protein                                           |
| <b>AT1G56330</b>               | <b>GTP-binding protein (SAR1B)</b>                                   |
| AT1G12200                      | flavin-containing monooxygenase family protein                       |
| AT5G54120                      | expressed protein                                                    |
| <b>AT1G70780</b>               | <b>expressed protein</b>                                             |
| AT5G17050                      | UDP-glucuronosyl transferase family protein                          |
| AT1G17100                      | SOUL heme-binding family protein                                     |
| AT4G31860                      | protein phosphatase 2C, putative                                     |
| AT3G59760                      | cysteine synthase, mitochondrial, putative                           |
| AT2G35940                      | homeodomain-containing protein                                       |
| AT3G51860                      | Arabidopsis thaliana Full-length cDNA Complete sequence              |
| AT5G26600                      | expressed protein                                                    |
| AT5G03490                      | UDP-glucuronosyl transferase family protein                          |
| AT1G14820                      | SEC14 cytosolic factor family protein                                |
| AT3G17380                      | meprin and TRAF homology domain-containing protein                   |
| AT2G40280                      | dehydration-responsive family protein                                |
| AT3G44880                      | Rieske [2Fe-2S] domain-containing protein                            |
| AT3G28540                      | AAA-type ATPase family protein                                       |
| AT1G52190                      | proton-dependent oligopeptide transport (POT) family protein         |
| AT3G55560                      | DNA-binding protein-related                                          |

|                                                         |                                                                 |
|---------------------------------------------------------|-----------------------------------------------------------------|
| AT2G44310                                               | calcium-binding EF hand family protein                          |
| AT5G63850                                               | amino acid transporter 4, putative (AAP4)                       |
| AT1G69730                                               | protein kinase family protein                                   |
| AT3G51370                                               | protein phosphatase 2C, putative                                |
| AT1G51090                                               | heavy-metal-associated domain-containing protein                |
| AT1G48100                                               | glycoside hydrolase family 28 protein                           |
| AT3G24030                                               | hydroxyethylthiazole kinase family protein                      |
| AT3G21560                                               | UDP-glucosyltransferase, putative                               |
| AT2G40950                                               | bZIP transcription factor family protein                        |
| AT1G79390                                               | expressed protein                                               |
| <a href="#">AT5G12010</a>                               | <a href="#">expressed protein</a>                               |
| AT4G15550                                               | UDP-glucose:indole-3-acetate beta-D-glucosyltransferase (IAGLU) |
| AT1G19140                                               | expressed protein                                               |
| AT4G35600                                               | protein kinase family protein                                   |
| AT5G39950                                               | thioredoxin H-type 2 (TRX-H-2)                                  |
| AT3G45210                                               | expressed protein                                               |
| AT2G13290                                               | glycosyl transferase family 17 protein                          |
| AT1G62380                                               | 1-aminocyclopropane-1-carboxylate oxidase, putative             |
| <a href="#">AT2G43910</a> /// <a href="#">AT2G43920</a> | <a href="#">thiol methyltransferase</a>                         |
| AT4G27900                                               | expressed protein                                               |
| AT5G08370                                               | alpha-galactosidase                                             |
| AT2G29990                                               | pyridine nucleotide-disulphide oxidoreductase family protein    |
| AT4G38630                                               | 26S proteasome regulatory subunit S5A (RPN10)                   |
| AT3G51250                                               | senescence/dehydration-associated protein-related               |
| AT4G19430                                               | expressed protein                                               |
| AT3G30460                                               | zinc finger (C3HC4-type RING finger) family protein             |
| AT5G07580                                               | ethylene-responsive element-binding family protein              |
| <a href="#">AT2G47590</a>                               | <a href="#">photolyase/blue light photoreceptor (PHR2)</a>      |
| <a href="#">AT3G45140</a>                               | <a href="#">lipoxygenase (LOX2)</a>                             |
| AT2G37760                                               | aldo/keto reductase family protein                              |
| AT5G44720                                               | molybdenum cofactor sulfurase family protein                    |
| <a href="#">AT5G02760</a>                               | <a href="#">protein phosphatase 2C family protein</a>           |
| AT5G20220                                               | zinc knuckle (CCHC-type) family protein                         |
| AT5G04230                                               | phenylalanine ammonia-lyase 3 (PAL3)                            |
| <a href="#">AT4G17030</a>                               | <a href="#">expansin-related identical</a>                      |
| AT5G50960                                               | nucleotide-binding family protein                               |
| <a href="#">AT3G01810</a>                               | <a href="#">expressed protein</a>                               |
| AT5G02620                                               | ankyrin repeat family protein                                   |
| AT1G21460                                               | nodulin MtN3 family protein                                     |
| AT4G36780                                               | brassinosteroid signalling positive regulator-related           |
| AT5G62390                                               | calmodulin-binding family protein                               |
| AT5G64260                                               | phosphate-responsive protein, putative                          |
| AT3G24170                                               | glutathione reductase, putative                                 |
| AT3G22750                                               | protein kinase, putative                                        |
| <a href="#">AT2G39770</a>                               | <a href="#">GDP-mannose pyrophosphorylase (GMP1)</a>            |
| AT3G07320                                               | glycosyl hydrolase family 17 protein                            |
| <a href="#">AT5G11670</a>                               | <a href="#">malic enzyme/ oxidoreductase</a>                    |
| AT5G65990                                               | amino acid transporter family protein                           |
| <a href="#">AT4G11600</a>                               | <a href="#">glutathione peroxidase, putative</a>                |
| AT1G78600                                               | zinc finger (B-box type) family protein                         |
| <a href="#">AT4G38710</a>                               | <a href="#">glycine-rich protein cylicin II</a>                 |
| AT2G40940                                               | ethylene response sensor                                        |
| AT2G04350                                               | long-chain-fatty-acid--CoA ligase family protein                |
| AT3G54140                                               | proton-dependent oligopeptide transport (POT) family protein    |
| AT1G22370                                               | UDP-glucosyl transferase family protein                         |
| AT2G24820                                               | Rieske [2Fe-2S] domain-containing protein                       |
| AT2G24200                                               | cytosol aminopeptidase                                          |
| AT4G32980                                               | homeobox protein (ATH1)                                         |
| <a href="#">AT4G12280</a> /// <a href="#">AT4G12290</a> | <a href="#">copper amine oxidase family protein</a>             |
| AT1G72175                                               | zinc finger (C3HC4-type RING finger) family protein             |

**AT5G63670**

AT3G25560  
AT4G14030 /// AT4G14040  
AT1G02080  
AT2G36960  
AT1G13560  
AT1G61150  
AT4G13840  
AT3G57110 /// AT5G60370

AT1G21410

AT3G15350

AT1G80130

AT4G34870

AT2G31670

AT2G38290

AT5G51880

AT2G46735

AT3G03600

AT4G25780

**AT1G12250**

AT1G26920

**AT5G13800**

AT5G47940

AT5G66770

AT5G01850

AT1G20770

AT1G75440

AT4G38220

AT3G04730

AT1G62030

AT5G47060

AT2G45720

AT1G79770

AT3G54420

AT4G39730

AT4G32290

AT1G09530

AT3G11690

AT3G20510

AT5G17520

AT1G33260

**AT5G07240**

AT4G13630

AT4G30080

AT2G15320

AT2G35320

AT4G37980

**AT2G34490**

AT1G05380

**AT1G54350**

AT3G23170

AT1G16060

AT5G44400

AT2G26690

AT3G07720

AT3G61440

AT4G26950

**AT5G53420**

AT5G03140

AT3G57880

**Arabidopsis thaliana Full-length cDNA Complete sequence**

protein kinase family protein  
selenium-binding protein, putative  
transcriptional regulator-related  
myb family transcription factor  
aminoalcoholphosphotransferase (AAPT1)  
expressed protein  
transferase family protein  
hypothetical protein  
F-box family protein  
glycosyltransferase family 14 protein  
expressed protein  
peptidyl-prolyl cis-trans isomerase  
expressed protein  
ammonium transporter 2 (AMT2)  
expressed protein  
expressed protein  
ribosomal protein S2, mitochondrial (RPS2)  
pathogenesis-related protein  
**thylakoid lumenal protein-related**  
expressed protein  
**hydrolase, alpha**  
expressed protein  
scarecrow transcription factor family protein  
protein kinase  
expressed protein  
ubiquitin-conjugating enzyme 16 (UBC16) E2  
aminoacylase, putative  
auxin-responsive protein  
DC1 domain-containing protein  
senescence-associated protein-related  
armadillo/beta-catenin repeat family protein  
expressed protein  
class IV chitinase (CHIV) ana]  
lipid-associated family protein  
expressed protein  
phytochrome interacting factor 3 (PIF3)  
expressed protein  
expressed protein  
root cap 1 (RCP1)  
protein kinase family protein  
**calmodulin-binding family protein**  
expressed protein  
transcriptional factor B3 family protein  
leucine-rich repeat family protein  
expressed protein  
mannitol dehydrogenase  
**cytochrome P450 family protein**  
PHD finger transcription factor, putative  
**ABC transporter family protein**  
expressed protein  
ovule development protein, putative  
FAD-binding domain-containing protein  
nitrate transporter (NTP2)  
kelch repeat-containing protein  
cysteine synthase, putative  
expressed protein  
**expressed protein**  
lectin protein kinase family protein  
C2 domain-containing protein

|                         |                                                                          |
|-------------------------|--------------------------------------------------------------------------|
| AT3G51430               | strictosidine synthase, putative                                         |
| AT1G30330               | auxin-responsive factor (ARF6) 7)                                        |
| AT1G59700               | glutathione S-transferase, putative                                      |
| AT5G04950               | nicotianamine synthase, putative                                         |
| AT5G42990               | ubiquitin-conjugating enzyme 18 (UBC18) E2                               |
| AT1G51760 /// AT1G51780 | IAA-amino acid hydrolase 3                                               |
| AT5G10730               | expressed protein                                                        |
| AT2G18730               | diacylglycerol kinase, putative                                          |
| AT2G23680               | stress-responsive protein, putative                                      |
| AT2G22860               | phytosulfokines 2 (PSK2)                                                 |
| AT5G27600               | AMP-binding protein, putative                                            |
| AT5G27390               | unknown protein                                                          |
| AT1G07420               | sterol 4-alpha-methyl-oxidase 2 (SMO2)                                   |
| AT3G51750               | expressed protein                                                        |
| AT2G46450               | cyclic nucleotide-regulated ion channel, putative                        |
| AT1G06000               | UDP-glucosyl transferase family protein                                  |
| AT1G05710               | ethylene-responsive protein, putative                                    |
| AT3G02300               | regulator of chromosome condensation (RCC1) family protein               |
| AT4G30450               | glycine-rich protein                                                     |
| AT2G40435               | expressed protein                                                        |
| AT1G55090               | carbon-nitrogen hydrolase family protein                                 |
| AT5G15410               | cyclic nucleotide-regulated ion channel                                  |
| AT1G21380               | VHS domain-containing protein                                            |
| AT1G17730               | SNF7 family protein                                                      |
| AT2G39450               | cation efflux family protein                                             |
| AT5G44190               | myb family transcription factor (GLK2)                                   |
| AT5G05960               | protease inhibitor                                                       |
| AT3G48610               | phosphoesterase family protein                                           |
| AT3G16150               | L-asparaginase, putative                                                 |
| AT1G77690               | amino acid permease, putative                                            |
| AT5G14230               | ankyrin repeat family protein                                            |
| AT3G16500               | auxin-responsive AUX/IAA family protein                                  |
| AT1G51440               | lipase class 3 family protein                                            |
| AT5G66760               | succinate dehydrogenase [ubiquinone] flavoprotein subunit, mitochondrial |
| AT2G43500               | RWP-RK domain-containing protein                                         |
| AT2G35740               | sugar transporter family protein                                         |
| AT1G10760               | starch excess protein (SEX1)                                             |
| AT5G37020               | auxin-responsive factor (ARF8)                                           |
| AT1G56650               | myb family transcription factor (MYB75)                                  |
| AT3G12800               | short-chain dehydrogenase                                                |
| AT3G55070               | expressed protein                                                        |
| AT2G15620               | ferredoxin--nitrite reductase, putative                                  |
| AT5G62070               | calmodulin-binding family protein                                        |
| AT4G31820               | phototropic-responsive NPH3 family protein                               |
| AT5G56860               | zinc finger (GATA type) family protein                                   |
| AT3G14200               | heat shock protein binding / unfolded protein binding                    |
| AT2G16740               | ubiquitin-conjugating enzyme, putative                                   |
| AT5G24530               | oxidoreductase, 2OG-Fe(II) oxygenase family protein                      |
| AT3G22530               | expressed protein                                                        |
| AT4G01810               | protein transport protein-related                                        |
| AT3G14230               | AP2 domain-containing protein RAP2.2                                     |
| AT1G63050               | membrane bound O-acyl transferase (MBOAT) family protein                 |
| AT1G12330               | expressed protein                                                        |
| AT5G06060               | tropinone reductase, putative                                            |
| AT5G41800               | amino acid transporter family protein                                    |
| AT1G64140               | expressed protein                                                        |
| AT1G65860               | flavin-containing monooxygenase family protein                           |
| AT3G21670               | nitrate transporter (NTP3)                                               |
| AT4G13430               | aconitase family protein                                                 |

AT5G18760 zinc finger (C3HC4-type RING finger) family protein  
 AT2G46930 pectinacetyltransferase, putative  
 AT2G16660 nodulin family protein  
 AT1G75500 nodulin MtN21 family protein  
 AT3G17609 bZIP transcription factor family protein  
 AT5G07350 nuclease/ nucleic acid binding mRNA, complete cds.  
 AT3G23560 MATE efflux family protein  
 AT2G43710 acyl-[acyl-carrier-protein] desaturase  
 AT5G45410 expressed protein  
 AT1G71040 multi-copper oxidase type I family protein  
 AT5G08750 zinc finger (C3HC4-type RING finger) family protein  
 AT5G57780 expressed protein  
 AT1G43710 serine decarboxylase  
 AT3G08640 alphavirus core protein family  
 AT1G55020 lipoxygenase (LOX1)  
 AT2G47630 esterase  
 AT3G63080 glutathione peroxidase, putative  
 AT4G15560 1-deoxy-D-xylulose 5-phosphate synthase, putative  
 AT4G32870 expressed protein  
 AT5G63790 no apical meristem (NAM) family protein  
 AT3G08730 serine/threonine protein kinase  
 AT5G36910 thionin (THI2.2)  
 AT1G52770 phototropic-responsive NPH3 family protein  
 AT1G62180 5'-adenylylsulfate reductase 2, chloroplast  
 AT1G64900 cytochrome P450  
 AT5G66590 allergen V5/Tpx-1-related family protein  
 AT4G34050 caffeoyl-CoA 3-O-methyltransferase  
 AT3G05650 disease resistance family protein  
 AT2G34660 glutathione S-conjugate ABC transporter (MRP2)  
 AT1G74090 sulfotransferase family protein  
 AT1G32690 expressed protein  
 AT1G21760 F-box family protein  
 AT4G16770 oxidoreductase, 2OG-Fe(II) oxygenase family protein  
 AT1G53165 protein kinase, putative  
 AT4G35040 bZIP transcription factor family protein  
 AT5G65450 ubiquitin carboxyl-terminal hydrolase family protein  
 AT1G31420 leucine-rich repeat transmembrane protein kinase  
 AT2G36870 xyloglucan:xyloglucosyl transferase, putative  
 AT3G02570 phosphomannose isomerase type I family protein  
 AT1G78570 NAD-dependent epimerase  
 AT1G77090 thylakoid lumenal 29.8 kDa protein  
 AT4G34920 /// AT4G34930 1-phosphatidylinositol phosphodiesterase-related  
 AT2G47510 /// AT5G50950 catalytic/ fumarate hydratase (FUM1)  
 AT5G45650 subtilase family protein  
 AT4G26530 fructose-bisphosphate aldolase  
 AT3G44100 MD-2-related lipid recognition domain-containing protein  
 AT3G13510 expressed protein  
 AT3G55130 ABC transporter family protein  
 AT5G62360 invertase  
 AT3G58990 aconitase C-terminal domain-containing protein  
 AT5G27670 histone H2A,  
 AT1G62800 aspartate aminotransferase, cytoplasmic isozyme 2  
 AT3G15680 zinc finger (Ran-binding) family protein  
 AT2G30520 signal transducer of phototropic response (RPT2)  
 AT5G63940 protein kinase family protein  
 AT1G17230 leucine-rich repeat family protein  
 AT2G42530 cold-responsive protein  
 AT3G61820 aspartyl protease family protein  
 AT3G48460 GDSL-motif lipase  
 AT5G03630 monodehydroascorbate reductase



|                         |                                                              |
|-------------------------|--------------------------------------------------------------|
| AT4G26850               | expressed protein                                            |
| AT3G58640               | protein kinase family protein                                |
| AT2G35060               | potassium transporter family protein                         |
| AT3G23580               | ribonucleoside-diphosphate reductase small chain             |
| AT5G15450               | heat shock protein 100, putative                             |
| AT5G67360               | cucumisin-like serine protease                               |
| AT1G75750               | <b>gibberellin-regulated protein 1 (GASA1)</b>               |
| AT1G64810               | expressed protein                                            |
| AT5G14940               | proton-dependent oligopeptide transport (POT) family protein |
| AT1G75450               | FAD-binding domain-containing protein                        |
| AT1G08250               | prephenate dehydratase family protein                        |
| AT1G47970               | expressed protein                                            |
| AT5G62430               | Dof-type zinc finger domain-containing protein               |
| AT3G48690               | expressed protein                                            |
| AT1G68570               | proton-dependent oligopeptide transport (POT) family protein |
| AT2G40540               | potassium transporter                                        |
| AT2G45210               | auxin-responsive protein-related                             |
| AT3G18710               | U-box domain-containing protein                              |
| AT2G29980               | omega-3 fatty acid desaturase, endoplasmic reticulum (FAD3)  |
| AT2G45080               | cyclin family protein                                        |
| AT4G01070               | UDP-glucuronosyl/UDP-glucosyl transferase family protein     |
| AT1G01520               | myb family transcription factor                              |
| AT1G31180 /// AT5G14200 | 3-isopropylmalate dehydrogenase, chloroplast                 |
| AT1G52340               | short-chain dehydrogenase                                    |
| AT3G13040               | myb family transcription factor                              |
| AT4G34610               | <b>homeodomain-containing protein</b>                        |
| AT3G29200               | chorismate mutase, chloroplast                               |
| AT3G27540               | glycosyl transferase family 17 protein                       |
| AT5G17860               | cation exchanger                                             |
| AT2G16500               | arginine decarboxylase 1                                     |
| AT3G30180               | cytochrome P450                                              |
| AT2G38010               | ceramidase family protein                                    |
| AT3G02580               | delta 7-sterol-C5-desaturase                                 |
| AT3G62820               | invertase                                                    |
| AT1G64040               | serine/threonine protein phosphatase PP1 isozyme 3 (TOPP3)   |
| AT4G17430               | expressed protein                                            |
| AT3G24180               | <b>expressed protein</b>                                     |
| AT3G13980               | expressed protein                                            |
| AT3G18280               | protease inhibitor                                           |
| AT1G05200               | glutamate receptor family protein                            |
| AT4G37080               | <b>expressed protein</b>                                     |
| AT3G15310               | expressed protein                                            |
| AT1G54200               | expressed protein                                            |
| AT2G39210               | nodulin family protein                                       |
| AT1G16400 /// AT1G16410 | cytochrome P450 family protein                               |
| AT5G10290               | leucine-rich repeat family protein                           |
| AT1G78100               | F-box family protein                                         |
| AT5G09440               | <b>phosphate-responsive protein</b>                          |
| AT4G01450               | nodulin MtN21 family protein                                 |
| AT5G43850               | acireductone dioxygenase                                     |
| AT1G22040               | kelch repeat-containing F-box family protein                 |
| AT4G29520               | <b>expressed protein</b>                                     |
| AT2G47490               | mitochondrial substrate carrier family protein               |
| AT5G65720               | cysteine desulfurase, mitochondrial                          |
| AT1G21250               | wall-associated kinase 1 (WAK1)                              |
| AT5G49230               | drought-responsive family protein                            |
| AT3G22680               | expressed protein                                            |
| AT4G36380               | cytochrome P450 90C1                                         |
| AT3G50660               | steroid 22-alpha-hydroxylase                                 |
| AT3G18080               | hydrolase                                                    |

|           |                                                              |
|-----------|--------------------------------------------------------------|
| AT2G39980 | transferase family protein                                   |
| AT5G41600 | reticulon family protein (RTNLB4)                            |
| AT3G14560 | expressed protein                                            |
| AT1G62560 | flavin-containing monooxygenase family protein               |
| AT5G05610 | PHD finger family protein                                    |
| AT1G49780 | U-box domain-containing protein                              |
| AT3G17810 | dihydroorotate dehydrogenase family protein                  |
| AT1G28680 | transferase family protein                                   |
| AT4G32770 | tocopherol cyclase, chloroplast                              |
| AT3G58040 | seven in absentia (SINA) family protein                      |
| AT5G24210 | lipase class 3 family protein                                |
| AT2G30490 | trans-cinnamate 4-monooxygenase                              |
| AT5G08565 | expressed protein                                            |
| AT1G01300 | aspartyl protease family protein                             |
| AT5G59130 | subtilase family protein                                     |
| AT2G20570 | transcription factor (GPR11)                                 |
| AT4G36810 | geranylgeranyl pyrophosphate synthase (GGPS1)                |
| AT3G44450 | expressed protein                                            |
| AT1G69760 | expressed protein                                            |
| AT5G57785 | expressed protein                                            |
| AT3G05500 | rubber elongation factor (REF) family protein                |
| AT3G13730 | cytochrome P450                                              |
| AT1G68550 | AP2 domain-containing transcription factor                   |
| AT2G40460 | proton-dependent oligopeptide transport (POT) family protein |
| AT4G27520 | plastocyanin-like domain-containing protein                  |
| AT2G44940 | AP2 domain-containing transcription factor TINY              |
| AT3G19680 | expressed protein                                            |
| AT4G34950 | nodulin family protein                                       |
| AT3G23640 | glycosyl hydrolase family 31 protein                         |
| AT3G52740 | expressed protein                                            |
| AT1G66890 | expressed protein                                            |
| AT5G13180 | no apical meristem (NAM) family protein                      |
| AT5G20070 | MutT/nudix family protein                                    |
| AT5G16010 | 3-oxo-5-alpha-steroid 4-dehydrogenase family protein         |
| AT5G13740 | carbohydrate transporter                                     |
| AT2G20750 | beta-expansin, putative (EXPB1)                              |
| AT3G63200 | patatin-related                                              |
| AT1G51070 | basic helix-loop-helix (bHLH) family protein                 |
| AT1G63090 | F-box family protein                                         |
| AT5G15850 | zinc finger protein CONSTANS-LIKE 1 (COL1)                   |
| AT5G01740 | wound-inducible protein wun1 protein                         |
| AT4G17880 | basic helix-loop-helix (bHLH) family protein                 |
| AT1G56670 | GDSL-motif lipase                                            |
| AT1G20070 | expressed protein                                            |
| AT3G25890 | AP2 domain-containing transcription factor, putative         |
| AT4G37590 | phototropic-responsive NPH3 family protein                   |
| AT4G03060 | 2-oxoglutarate-dependent dioxygenase                         |
| AT3G47560 | esterase                                                     |
| AT5G52310 | low-temperature-responsive protein 78 (LTI78)                |
| AT5G67390 | expressed protein                                            |
| AT1G49010 | myb family transcription factor                              |
| AT3G55960 | NLI interacting factor (NIF) family protein                  |
| AT1G32900 | starch synthase                                              |
| AT1G70580 | glutamate:glyoxylate aminotransferase 2 (GGT2)               |
| AT1G72770 | protein phosphatase 2C P2C-HA                                |
| AT3G23920 | beta-amylase, putative                                       |
| AT3G47420 | glycerol-3-phosphate transporter, putative                   |
| AT3G11110 | zinc finger (C3HC4-type RING finger) family protein          |
| AT3G60690 | auxin-responsive family protein                              |
| AT1G49470 | expressed protein                                            |

|                         |                                                       |
|-------------------------|-------------------------------------------------------|
| AT5G15740               | expressed protein                                     |
| AT3G60080               | zinc finger (C3HC4-type RING finger) family protein   |
| AT1G21050               | expressed protein                                     |
| AT3G17120               | expressed protein                                     |
| AT2G42540               | cold-responsive protein                               |
| AT3G12320               | expressed protein                                     |
| AT5G15960 /// AT5G15970 | stress-responsive protein (KIN1)                      |
| AT2G36910               | multidrug resistance P-glycoprotein (PGP1)            |
| AT2G29390               | sterol 4-alpha-methyl-oxidase 1 (SMO1)                |
| AT5G07690               | myb family transcription factor (MYB29)               |
| AT5G56040               | leucine-rich repeat protein kinase,                   |
| AT3G56260               | expressed protein                                     |
| AT4G17460               | homeobox-leucine zipper protein 1 (HAT1)              |
| AT3G12920               | expressed protein                                     |
| AT3G50750               | brassinosteroid signalling positive regulator-related |
| AT2G41250               | haloacid dehalogenase-like hydrolase family protein   |
| AT5G55620               | expressed protein                                     |
| AT4G37560               | formamidase, putative                                 |
| AT2G15020               | expressed protein                                     |
| AT5G15910               | dehydrogenase-related                                 |
| AT2G44670               | senescence-associated protein-related                 |
| AT3G17800               | expressed protein                                     |
| AT2G01420               | auxin transport protein                               |
| AT1G72180               | leucine-rich repeat transmembrane protein kinase      |
| AT1G28440               | leucine-rich repeat transmembrane protein kinase      |
| AT1G69160               | expressed protein                                     |
| AT1G01470               | late embryogenesis abundant protein, putative         |
| AT5G66420               | expressed protein                                     |
| AT3G23590               | expressed protein                                     |
| AT4G22200               | potassium channel protein 2                           |
| AT4G39400               | brassinosteroid insensitive 1 (BR1)                   |
| AT5G54130               | calcium-binding EF hand family protein                |
| AT4G39800               | inositol-3-phosphate synthase isozyme 1               |
| AT1G76240               | expressed protein                                     |
| AT5G15950               | adenosylmethionine decarboxylase family protein       |
| AT5G65310               | homeobox-leucine zipper protein 5 (HB-5)              |
| AT1G06570               | 4-hydroxyphenylpyruvate dioxygenase (HPD)             |

---
