# Supplementary material
Source: PubMed Central journal article supplement (PMC2678668)
Supplement: 0812346106_ST3_PDF.pdf [file 0812346106_ST3_PDF.pdf]

**Table S3. List of genes down-regulated in *herk1 the1* mutant adult plants**

Microarray experiments and analyses are described in Materials and Methods. The overlaps with BL-induced (purple) or BR-repressed (red) in WT are indicated. The cell wall genes implicated in cell elongation are highlighted.

| AGI       | Annotation                                                                  |
|-----------|-----------------------------------------------------------------------------|
| AT3G46290 | protein kinase                                                              |
| AT1G69530 | expansin, putative (EXP1)                                                   |
| AT2G20750 | beta-expansin, putative (EXPB1)                                             |
| AT4G29520 | expressed protein                                                           |
| AT3G43590 | zinc knuckle (CCHC-type) family protein                                     |
| AT5G24210 | lipase class 3 family protein                                               |
| AT1G69160 | expressed protein                                                           |
| AT2G40490 | uroporphyrinogen decarboxylase, putative                                    |
| AT1G52290 | protein kinase family protein contains                                      |
| AT4G30110 | ATPase E1-E2 type family protein                                            |
| AT3G62600 | DNAJ heat shock family protein                                              |
| AT5G02760 | protein phosphatase 2C family protein                                       |
| AT5G18600 | glutaredoxin family protein                                                 |
| AT4G24460 | expressed protein                                                           |
| AT4G16870 | copla-like retrotransposon family                                           |
| AT5G49820 | expressed protein                                                           |
| AT3G13120 | 30S ribosomal protein S10, chloroplast                                      |
| AT5G11420 | expressed protein                                                           |
| AT4G26555 | immunophilin / FKBP-type peptidyl-prolyl cis-trans isomerase family protein |
| AT1G64510 | ribosomal protein S6 family protein                                         |
| AT1G63700 | protein kinase, putative                                                    |
| AT1G70580 | glutamate:glyoxylate aminotransferase 2 (GGT2)                              |
| AT1G09520 | expressed protein                                                           |
| AT5G51550 | phosphate-responsive 1 family protein                                       |
| AT1G67700 | expressed protein                                                           |
| AT2G41250 | haloacid dehalogenase-like hydrolase family protein                         |
| AT1G75750 | gibberellin-regulated protein 1 (GASA1)                                     |
| AT5G45650 | subtilase family protein                                                    |
| AT4G37080 | expressed protein                                                           |
| AT5G48300 | glucose-1-phosphate adenyltransferase small subunit 1 (APS1)                |
| AT4G25050 | acyl carrier family protein                                                 |
| AT1G56330 | GTP-binding protein (SAR1B)                                                 |
| AT1G76110 | high mobility group (HMG1)                                                  |
| AT5G07240 | calmodulin-binding family protein                                           |
| AT4G08280 | expressed protein                                                           |
| AT5G23110 | zinc finger (C3HC4-type RING finger) family protein                         |
| AT5G54380 | protein kinase family protein                                               |
| AT1G63260 | senescence-associated family protein                                        |
| AT4G19830 | immunophilin / FKBP-type peptidyl-prolyl cis-trans isomerase family protein |
| AT4G38100 | expressed protein                                                           |
| AT3G52720 | carbonic anhydrase family protein                                           |
| AT5G19750 | peroxisomal membrane 22 kDa family protein                                  |
| AT3G11630 | 2-cys peroxiredoxin, chloroplast (BAS1)                                     |
| AT5G14660 | Full-length cDNA Complete sequence                                          |
| AT5G13390 | expressed protein                                                           |
| AT3G13920 | eukaryotic translation initiation factor 4A-1                               |
| AT5G48460 | fimbrin-like protein, putative                                              |
| AT5G23070 | thymidine kinase, putative                                                  |
| AT2G43710 | acyl-[acyl-carrier-protein] desaturase                                      |
| AT4G37800 | xyloglucan:xyloglucosyl transferase (XTH7)                                  |
| AT4G39300 | expressed protein                                                           |
| AT1G53165 | protein kinase, putative                                                    |
| AT3G10060 | immunophilin, putative                                                      |
| AT2G26900 | putative Na <sup>+</sup> dependent ileal bile acid transporter              |
| AT1G05630 | endonuclease                                                                |

|           |                                                                |
|-----------|----------------------------------------------------------------|
| AT1G49010 | myb family transcription factor                                |
| AT5G27290 | expressed protein                                              |
| AT1G17730 | SNF7 family protein                                            |
| AT3G48100 | two-component responsive regulator                             |
| AT5G47040 | Lon protease homolog 1, mitochondrial                          |
| AT3G24180 | expressed protein                                              |
| AT2G47590 | photolyase                                                     |
| AT1G01090 | pyruvate dehydrogenase E1 component alpha subunit, chloroplast |
| AT5G14100 | ABC transporter family protein                                 |
| AT1G21610 | wound-responsive family protein                                |
| AT1G09210 | calcium ion binding (AT1G09210) mRNA                           |
| AT1G54350 | ABC transporter family protein                                 |
| AT1G76400 | ribophorin I family protein                                    |
| AT1G30120 | pyruvate dehydrogenase E1 component beta subunit, chloroplast  |
| AT1G14345 | expressed protein                                              |
| AT4G33580 | carbonic anhydrase family protein                              |
| AT2G36850 | glycosyl transferase family 48 protein                         |
| AT1G76240 | expressed protein                                              |
| AT5G27390 | unknown protein                                                |
| AT1G30610 | pentatricopeptide (PPR) repeat-containing protein              |
| AT1G64680 | expressed protein                                              |
| AT5G35790 | glucose-6-phosphate 1-dehydrogenase                            |
| AT3G29240 | expressed protein                                              |
| AT5G52780 | expressed protein                                              |
| AT4G11460 | protein kinase family protein                                  |
| AT3G06070 | expressed protein                                              |
| AT3G11710 | lysyl-tRNA synthetase, putative                                |
| AT1G28110 | serine carboxypeptidase S10 family protein                     |
| AT3G54050 | fructose-1,6-bisphosphatase, putative                          |
| AT2G31730 | ethylene-responsive protein, putative                          |
| AT2G47910 | expressed protein                                              |
| AT3G48720 | transferase family protein                                     |
| AT5G27710 | expressed protein                                              |
| AT5G02180 | amino acid transporter family protein                          |
| AT5G12050 | expressed protein                                              |
| AT2G44640 | expressed protein                                              |
| AT4G20360 | elongation factor Tu                                           |
| AT5G15910 | dehydrogenase-related                                          |
| AT4G09730 | DEAD/DEAH box helicase                                         |
| AT5G62280 | expressed protein                                              |
| AT5G08330 | TCP family transcription factor, putative                      |
| AT2G28950 | expansin, putative (EXP6)                                      |
| AT1G54270 | eukaryotic translation initiation factor 4A-2                  |
| AT5G56040 | leucine-rich repeat protein kinase, putative                   |
| AT2G01590 | expressed protein                                              |
| AT5G63670 | Full-length cDNA Complete sequence                             |
| AT4G39680 | SAP domain-containing protein                                  |
| AT4G31850 | pentatricopeptide (PPR) repeat-containing protein              |
| AT5G66530 | aldose 1-epimerase family protein                              |
| AT1G32550 | ferredoxin family protein                                      |
| AT5G61790 | calnexin 1 (CNX1)                                              |
| AT3G01550 | triose phosphate/phosphate translocator                        |
| AT5G15950 | adenosylmethionine decarboxylase family protein                |
| AT1G22335 | expressed protein                                              |
| AT1G32500 | ATP-binding-cassette transporter, putative                     |
| AT4G18480 | magnesium-chelatase subunit chlI, chloroplast                  |
| AT3G01810 | expressed protein                                              |
| AT1G07370 | proliferating cell nuclear antigen 1 (PCNA1)                   |
| AT5G16620 | hydroxyproline-rich glycoprotein family protein                |
| AT1G10470 | two-component responsive regulator                             |

|                         |                                                                        |
|-------------------------|------------------------------------------------------------------------|
| AT1G17360               | COP1-interacting protein-related                                       |
| AT1G16880               | uridylyltransferase-related                                            |
| AT5G58570 /// AT5G58560 | expressed protein                                                      |
| AT4G29810               | mitogen-activated protein kinase                                       |
| AT2G39800 /// AT3G55610 | delta 1-pyrroline-5-carboxylate synthetase A                           |
| AT1G06350 /// AT1G06360 | fatty acid desaturase family protein                                   |
| AT4G21210               | expressed protein                                                      |
| AT1G18460               | lipase family protein                                                  |
| AT5G40870               | uracil phosphoribosyltransferase, putative                             |
| AT4G23750               | AP2 domain-containing transcription factor                             |
| AT5G66920               | multi-copper oxidase type I family protein                             |
| AT1G62180               | 5'-adenylylsulfate reductase 2, chloroplast                            |
| AT5G62840               | phosphoglycerate/bisphosphoglycerate mutase family protein             |
| AT3G18130               | guanine nucleotide-binding family protein                              |
| AT1G72430               | auxin-responsive protein-related                                       |
| AT5G11450               | oxygen-evolving complex-related 23 kDa polypeptide                     |
| AT1G80030               | DNAJ heat shock protein, putative                                      |
| AT2G44920               | At2g44920 mRNA sequence.                                               |
| AT1G26910               | 60S ribosomal protein L10 (RPL10B)                                     |
| AT1G71040               | multi-copper oxidase type I family protein                             |
| AT1G75210               | 5'-nucleotidase (AT1G75210) mRNA                                       |
| AT3G05000               | transport protein particle (TRAPP) component Bet3 family protein       |
| AT1G03060               | WD-40 repeat family protein                                            |
| AT5G61410               | ribulose-phosphate 3-epimerase, chloroplast, putative                  |
| AT1G12250               | thylakoid lumenal protein-related                                      |
| AT2G24762               | expressed protein                                                      |
| AT1G19150               | chlorophyll A-B binding protein, putative                              |
| AT5G55730               | fasciclin-like arabinogalactan-protein (FLA1)                          |
| AT1G73020               | expressed protein                                                      |
| AT2G40610               | expansin, putative (EXP8)                                              |
| AT1G08650               | phosphoenolpyruvate carboxylase kinase                                 |
| AT2G21960               | expressed protein                                                      |
| AT1G19050               | two-component responsive regulator                                     |
| AT5G10980               | histone H3                                                             |
| AT3G01680               | expressed protein                                                      |
| AT5G23020               | MAM-L mRNA                                                             |
| AT2G29290               | tropinone reductase, putative                                          |
| AT2G43560               | immunophilin                                                           |
| AT1G70070               | DEAD/DEAH box helicase, putative                                       |
| AT5G08530               | NADH-ubiquinone oxidoreductase 51 kDa subunit, mitochondrial, putative |
| AT5G63050               | expressed protein                                                      |
| AT1G22690               | gibberellin-responsive protein, putative                               |
| AT1G60600               | UbiA prenyltransferase family protein                                  |
| AT3G49680               | branched-chain amino acid aminotransferase 3                           |
| AT5G24530               | oxidoreductase, 2OG-Fe(II) oxygenase family protein                    |
| AT5G65310               | homeobox-leucine zipper protein 5 (HB-5)                               |
| AT4G34610               | homeodomain-containing protein                                         |
| AT3G43220               | phosphoinositide phosphatase family protein                            |
| AT1G15280               | glycine-rich protein                                                   |
| AT4G19100               | expressed protein                                                      |
| AT4G27520               | plastocyanin-like domain-containing protein                            |
| AT3G47560               | esterase                                                               |
| AT4G33480               | expressed protein                                                      |
| AT3G58070               | zinc finger (C2H2 type) family protein                                 |
| AT4G16120               | phytochelatin synthetase-related                                       |
| AT3G14770               | nodulin MtN3 family protein                                            |
| AT1G08540               | RNA polymerase sigma subunit SigB (sigB)                               |
| AT4G39040               | expressed protein                                                      |
| AT5G66000               | expressed protein                                                      |
| AT2G43130               | Ras-related protein (ARA-4)                                            |

AT5G03350 legume lectin family protein  
 AT4G34260 expressed protein  
 AT2G01870 expressed protein  
 AT2G47930 hydroxyproline-rich glycoprotein family protein  
 AT2G46780 RNA recognition motif (RRM)-containing protein  
 AT1G22590 transcription factor (AT1G22590) mRNA  
 AT1G44000 expressed protein  
 AT1G74670 gibberellin-responsive protein, putative  
 AT4G01720 WRKY family transcription factor  
 AT1G53160 squamosa promoter-binding protein-like 4 (SPL4)  
 AT1G62750 elongation factor Tu family protein  
 AT3G14240 subtilase family protein  
 AT1G31420 leucine-rich repeat transmembrane protein kinase, putative  
 AT2G48070 expressed protein  
 AT3G28040 leucine-rich repeat transmembrane protein kinase, putative  
 AT5G14260 SET domain-containing protein  
 AT3G30720 expressed protein  
 AT5G15830 bZIP transcription factor family protein  
 AT1G32990 ribosomal protein L11 family protein  
 AT3G50790 late embryogenesis abundant protein, putative  
 AT2G33180 expressed protein  
 AT1G47490 /// AT1G47500 RNA-binding protein 47 (RBP47), putative  
 MORN (Membrane Occupation and Recognition Nexus) repeat-containing protein  
 AT1G75010 phototropic-responsive NPH3 family protein  
 AT3G19850 leucine-rich repeat transmembrane protein kinase  
 AT3G49670 expressed protein  
 AT5G64510 expressed protein  
 AT4G38710 glycine-rich protein cylicin II  
 AT1G07110 fructose-6-phosphate 2-kinase  
 AT3G16850 glycoside hydrolase family 28 protein  
 AT1G03400 2-oxoglutarate-dependent dioxygenase, putative  
 AT3G46430 expressed protein  
 AT5G20630 germin-like protein (GER3)  
 AT5G19820 PBS lyase HEAT-like repeat-containing protein  
 AT4G35040 bZIP transcription factor family protein  
 AT3G02490 pentatricopeptide (PPR) repeat-containing protein  
 AT1G43190 polypyrimidine tract-binding protein, putative  
 AT5G65080 MADS box protein FCL1mRNA  
 AT4G25130 peptide methionine sulfoxide reductase  
 AT1G01060 myb family transcription factor  
 AT4G08300 nodulin MtN21 family protein  
 AT4G03080 kelch repeat-containing serine  
 AT4G33220 pectinesterase family protein  
 AT2G46450 cyclic nucleotide-regulated ion channel, putative (CNGC12)  
 AT4G09650 ATP synthase delta chain, chloroplast, putative  
 AT3G59990 methionyl aminopeptidase, putative  
 AT1G70410 carbonic anhydrase, putative  
 AT2G26400 metal ion binding  
 AT2G15290 expressed protein  
 AT5G15540 expressed protein  
 AT4G34290 SWIB complex BAF60b domain-containing protein  
 AT4G34820 expressed protein  
 AT1G19960 expressed protein  
 AT4G26700 fimbrin-like protein (FIM1)  
 AT4G01810 protein transport protein-related  
 AT5G18760 zinc finger (C3HC4-type RING finger) family protein  
 AT2G27060 leucine-rich repeat transmembrane protein kinase, putative  
 AT5G23060 unknown protein  
 AT3G27020 oligopeptide transporter OPT family protein  
 AT5G60590 yrdC protein-related
