# Supplementary material
Source: PubMed Central journal article supplement (PMC2678668)
Supplement: 0812346106_ST4_PDF.pdf [file 0812346106_ST4_PDF.pdf]

**Table S4. List of genes up-regulated in *herk1 the1* mutant adult plants**

Microarray experiments and analyses are described in Materials and Methods. The overlaps with BL-induced (green) or BR-repressed (blue) in WT are indicated. The cell wall genes implicated in cell elongation are highlighted.

| AGI                                   | Annotation                                                             |
|---------------------------------------|------------------------------------------------------------------------|
| AT3G52850                             | vacuolar sorting receptor, putative                                    |
| AT3G03150                             | expressed protein                                                      |
| AT4G07390                             | PQ-loop repeat family protein                                          |
| AT1G16370                             | transporter-related low similarity to organic cation transporter OCTN1 |
| AT5G13220                             | expressed protein                                                      |
| AT4G28910                             | expressed protein                                                      |
| AT4G29740                             | FAD-binding domain-containing protein                                  |
| AT3G03690                             | glycosyltransferase family 14 protein                                  |
| AT1G54030                             | GDSL-motif lipase, putative                                            |
| AT5G27600                             | AMP-binding protein, putative                                          |
| AT4G27654                             | expressed protein                                                      |
| AT1G59870                             | ABC transporter family protein                                         |
| AT1G73040                             | jacalin lectin family protein                                          |
| AT1G76640                             | calmodulin-related protein, putative                                   |
| AT1G30530                             | UDP-glucuronosyl                                                       |
| AT4G10390                             | protein kinase family protein                                          |
| AT1G10070                             | branched-chain amino acid aminotransferase 2                           |
| AT1G33110                             | MATE efflux family protein                                             |
| AT1G21100                             | O-methyltransferase, putative                                          |
| AT2G43060                             | expressed protein                                                      |
| AT5G02100                             | oxysterol-binding family protein                                       |
| AT1G02500                             | S-adenosylmethionine synthetase 1 (SAM1)                               |
| AT2G22890                             | expressed protein; expression supported by MPSS                        |
| AT2G38750                             | ANNAT4 (ANNEXIN 4); calcium ion binding                                |
| AT5G10860                             | CBS domain-containing protein                                          |
| AT1G50480 /// AT2G12200 /// AT2G12280 | formate--tetrahydrofolate ligase                                       |
| AT5G42810                             | expressed protein                                                      |
| AT5G55080                             | Ras-related GTP-binding protein, putative                              |
| AT4G17486                             | expressed protein                                                      |
| AT1G14990                             | expressed protein                                                      |
| AT3G23240                             | ethylene-responsive factor 1                                           |
| AT4G36990                             | heat shock factor protein 4 (HSF4)                                     |
| AT5G67080                             | protein kinase family protein                                          |
| AT4G31500                             | cytochrome P450 83B1 (CYP83B1)                                         |
| AT1G52000                             | jacalin lectin family protein                                          |
| AT1G33590                             | disease resistance protein-related                                     |
| AT4G25030                             | expressed protein                                                      |
| AT4G11350                             | fringe-related protei                                                  |
| AT5G38120                             | 4-coumarate--CoA ligase family protein                                 |
| AT4G21400                             | protein kinase family protein                                          |
| AT2G24940 /// AT2G24945               | cytochrome b5 domain-containing protein                                |
| AT1G10530                             | expressed protein                                                      |
| AT5G22300                             | nitrilase 4 (NIT4)                                                     |
| AT3G49240                             | pentatricopeptide (PPR) repeat-containing protein                      |
| AT2G15960                             | expressed protein                                                      |
| AT3G30340                             | nodulin MtN21 family protein                                           |
| AT4G11310 /// AT4G11320               | cysteine proteinase, putative                                          |
| AT2G04400                             | indole-3-glycerol phosphate synthase (IGPS)                            |
| AT5G37740                             | C2 domain-containing protein                                           |
| AT2G26780                             | expressed protein                                                      |
| AT4G09830                             | expressed protein                                                      |
| AT5G43780                             | sulfate adenylyltransferase 4                                          |
| AT1G07170                             | expressed protein                                                      |
| AT2G14290                             | F-box family protein                                                   |
| AT1G46264                             | heat shock transcription factor family protein                         |

|                         |                                                           |
|-------------------------|-----------------------------------------------------------|
| AT4G21865               | expressed protein                                         |
| AT4G34590               | bZIP transcription factor family protein                  |
| AT1G11670               | MATE efflux family protein                                |
| AT4G09820               | basic helix-loop-helix (bHLH) family protein              |
| AT4G18360               | (S)-2-hydroxy-acid oxidase, peroxisomal, putative         |
| AT1G67300               | hexose transporter, putative                              |
| AT1G52100               | jacalin lectin family protein                             |
| AT5G49280               | hydroxyproline-rich glycoprotein family protein           |
| AT2G14750               | adenylylsulfate kinase 1 (AKN1)                           |
| AT5G05950               | expressed protein                                         |
| AT4G21326               | subtilase family protein                                  |
| AT1G70810               | C2 domain-containing protein                              |
| AT4G36040               | DNAJ heat shock N-terminal domain-containing protein      |
| AT1G10140               | expressed protein                                         |
| AT1G05710               | ethylene-responsive protein, putative                     |
| AT1G19180               | expressed protein                                         |
| AT5G50840               | expressed protein                                         |
| AT1G55210               | disease resistance response protein-related               |
| AT3G58710               | WRKY family transcription factor                          |
| AT4G37300               | expressed protein                                         |
| AT5G13930               | chalcone synthase                                         |
| AT5G11410               | protein kinase family protein                             |
| AT1G32900               | starch synthase, putative                                 |
| AT5G17990               | anthranilate phosphoribosyltransferase                    |
| AT4G29690               | type I phosphodiesterase                                  |
| AT2G15580               | zinc finger (C3HC4-type RING finger) family protein       |
| AT1G58270               | mepirin and TRAF homology domain-containing protein       |
| AT5G53750               | expressed protein                                         |
| AT2G16720               | myb family transcription factor                           |
| AT3G50440               | hydrolase, alpha                                          |
| AT3G02875               | IAA-amino acid hydrolase 1 (ILR1)                         |
| AT3G20390               | endoribonuclease L-PSP family protein                     |
| AT2G02870               | kelch repeat-containing F-box family protein              |
| AT4G30460               | glycine-rich protein                                      |
| AT3G14200               | heat shock protein binding / unfolded protein binding     |
| AT3G08990               | yippee family protein                                     |
| AT5G24430               | calcium-dependent protein kinase, putative                |
| AT5G67160               | transferase family protein                                |
| AT3G13110               | serine O-acetyltransferase (SAT-1)                        |
| AT5G13330               | AP2 domain-containing transcription factor family protein |
| AT3G14720               | mitogen-activated protein kinase, putative                |
| AT3G15500               | no apical meristem (NAM) family protein (NAC3)            |
| AT1G25275               | expressed protein                                         |
| AT3G55130               | ABC transporter family protein                            |
| AT3G25180               | cytochrome P450 family protein                            |
| AT2G45570               | cytochrome P450 76C2                                      |
| AT5G54160               | quercetin 3-O-methyltransferase 1                         |
| AT5G49630               | amino acid permease 6 (AAP6)                              |
| AT4G37310               | cytochrome P450, putative                                 |
| AT1G54130               | RelA/SpoT protein, putative (RSH3)                        |
| AT5G17420               | cellulose synthase, catalytic subunit (IRX3)              |
| AT3G22290               | expressed protein                                         |
| AT5G43745               | phosphotransferase-related                                |
| AT4G17230               | scarecrow-like transcription factor 13 (SCL13)            |
| AT1G17130               | cell cycle control protein-related                        |
| AT1G72220               | zinc finger (C3HC4-type RING finger) family protein       |
| AT5G11670               | malic enzyme                                              |
| AT1G27030               | expressed protein                                         |
| AT2G47650 /// AT3G62830 | NAD-dependent epimerase                                   |
| AT1G24070               | glycosyl transferase family 2 protein                     |

|                         |                                                                                   |
|-------------------------|-----------------------------------------------------------------------------------|
| AT1G09920               | unknown protein                                                                   |
| AT5G63450               | cytochrome P450, putative                                                         |
| AT2G39260               | MIF4G domain-containing protein                                                   |
| AT4G24340 /// AT4G24350 | phosphorylase family protein                                                      |
| AT1G69450               | early-responsive to dehydration protein-related                                   |
| AT2G41380               | embryo-abundant protein-related                                                   |
| AT3G55290 /// AT3G55310 | short-chain dehydrogenase                                                         |
| AT1G19300               | glycosyl transferase family 8 protein                                             |
| AT1G75300               | isoflavone reductase, putative                                                    |
| AT3G03420               | Ku70-binding family protein                                                       |
| AT5G48485               | protease inhibitor                                                                |
| AT1G34040 /// AT1G34060 | carbon-sulfur lyase (AT1G34040) mRNA                                              |
| AT1G52400               | glycosyl hydrolase family 1 protein                                               |
| AT3G49110 /// AT3G49120 | peroxidase 33 (PER33)                                                             |
| AT3G47295               | expressed protein                                                                 |
| AT2G43910 /// AT2G43920 | thiol methyltransferase, putative                                                 |
| AT3G44860 /// AT3G44870 | S-adenosyl-L-methionine:carboxyl methyltransferase family protein                 |
| AT1G28050               | zinc finger (B-box type) family protein                                           |
| AT1G09970               | leucine-rich repeat transmembrane protein kinase, putative                        |
| AT3G23640               | glycosyl hydrolase family 31 protein                                              |
| AT2G37580               | zinc finger (C3HC4-type RING finger) family protein                               |
| AT1G63720               | expressed protein similar to putative protein GB:CAA18164                         |
| AT1G76070               | expressed protein                                                                 |
| AT5G10300               | hydrolase, alpha                                                                  |
| AT3G29590               | transferase family protein                                                        |
| AT5G39410               | expressed protein                                                                 |
| AT5G54960               | pyruvate decarboxylase, putative                                                  |
| AT2G06255               | expressed protein                                                                 |
| AT2G47180               | galactinol synthase, putative                                                     |
| AT5G46180               | ornithine aminotransferase, putative                                              |
| AT1G52720               | expressed protein                                                                 |
| AT1G11580               | pectin methylesterase, putative                                                   |
| AT5G16010               | 3-oxo-5-alpha-steroid 4-dehydrogenase family protein                              |
| AT5G27520               | mitochondrial substrate carrier family protein                                    |
| AT3G51240               | naringenin 3-dioxygenase                                                          |
| AT5G50720               | ABA-responsive protein (HVA22e)                                                   |
| AT5G17220               | glutathione S-transferase, putative                                               |
| AT1G23820               | spermidine synthase 1 (SPDSYN1)                                                   |
| AT2G31390               | pfkB-type carbohydrate kinase family protein                                      |
| AT3G07760               | expressed protein                                                                 |
| AT5G20950               | glycosyl hydrolase family 3 protein beta-D-glucan exohydrolase, Nicotiana tabacum |
| AT3G57450               | expressed protein                                                                 |
| AT4G21390               | S-locus lectin protein kinase family protein                                      |
| AT2G02850               | plastocyanin-like domain-containing protein                                       |
| AT3G16530               | legume lectin family protein                                                      |
| AT2G26650               | potassium channel protein 1 (AKT1)                                                |
| AT5G52320               | cytochrome P450, putative                                                         |
| AT1G15100               | zinc finger (C3HC4-type RING finger) family protein                               |
| AT2G46680               | homeobox-leucine zipper protein 7 (HB-7)                                          |
| AT4G13950               | rapid alkalization factor (RALF) family protein                                   |
| AT5G20230               | plastocyanin-like domain-containing protein                                       |
| AT2G38050               | 3-oxo-5-alpha-steroid 4-dehydrogenase, putative                                   |
| AT4G16760               | acyl-CoA oxidase (ACX1)                                                           |
| AT4G27410               | no apical meristem (NAM) family protein                                           |
| AT2G26740 /// AT2G26750 | epoxide hydrolase, soluble (sEH)                                                  |
| AT4G17470               | palmitoyl protein thioesterase family protein                                     |
| AT2G25810               | tonoplast intrinsic protein, putative                                             |
| AT4G37990               | mannitol dehydrogenase, putative (ELI3-2)                                         |
| AT4G24380               | expressed protein                                                                 |
| AT4G27450               | unknown protein                                                                   |

|                                           |                                                                                |
|-------------------------------------------|--------------------------------------------------------------------------------|
| AT1G71050                                 | heavy-metal-associated domain-containing protein                               |
| AT2G29450                                 | glutathione S-transferase (103-1A)                                             |
| AT5G60300                                 | lectin protein kinase family protein                                           |
| AT5G27760                                 | hypoxia-responsive family protein                                              |
| AT4G25900                                 | aldose 1-epimerase family protein                                              |
| AT2G34730                                 | myosin heavy chain-related                                                     |
| AT2G28110                                 | exostosin family protein contains 1 transmembrane domain;                      |
| AT3G18830                                 | mannitol transporter, putative                                                 |
| AT3G49780                                 | phytosulfokines 3 (PSK3)                                                       |
| AT2G23320                                 | WRKY family transcription factor                                               |
| AT5G24420                                 | glucosamine/galactosamine-6-phosphate isomerase-related                        |
| AT1G70780                                 | expressed protein                                                              |
| AT3G23550                                 | MATE efflux family protein                                                     |
| AT1G68620                                 | expressed protein                                                              |
| AT1G67980                                 | caffeoyl-CoA 3-O-methyltransferase, putative                                   |
| AT2G45290                                 | transketolase, putative strong similarity to transketolase 1                   |
| AT5G12890                                 | UDP-glucuronosyl                                                               |
| AT5G64260                                 | phosphate-responsive protein, putative                                         |
| AT4G22270                                 | expressed protein                                                              |
| AT3G59050                                 | amine oxidase family protein                                                   |
| AT3G50740                                 | UDP-glucosyl transferase family protein                                        |
| AT3G23250                                 | myb family transcription factor (MYB15)                                        |
| AT4G15610                                 | integral membrane family protein                                               |
| AT4G21680                                 | proton-dependent oligopeptide transport (POT) family protein                   |
| AT3G44320                                 | nitrilase 3 (NIT3)                                                             |
| AT5G05390                                 | laccase, putative                                                              |
| AT1G72520                                 | lipoxygenase, putative                                                         |
| AT1G58200                                 | mechanosensitive ion channel domain-containing protein                         |
| AT5G14710                                 | unknown protein                                                                |
| AT1G63910                                 | myb family transcription factor (MYB103)                                       |
| AT3G59220                                 | pirin, putative                                                                |
| AT5G26980                                 | syntaxin 41 (SYP41)                                                            |
| AT2G39050                                 | hydroxyproline-rich glycoprotein family protein                                |
| AT5G39730                                 | avirulence-responsive protein-related                                          |
| AT3G10500                                 | no apical meristem (NAM) family protein                                        |
| AT3G62650                                 | expressed protein putative mitochondrial carrier protein                       |
| AT2G22760                                 | basic helix-loop-helix (bHLH) family protein                                   |
| AT2G16890                                 | UDP-glucosyl transferase family protein                                        |
| AT1G69360                                 | expressed protein                                                              |
| AT3G17250                                 | protein phosphatase 2C-related                                                 |
| AT2G37770                                 | aldo/keto reductase family protein                                             |
| AT5G50370                                 | adenylate kinase, putative                                                     |
| AT1G17020                                 | oxidoreductase, 2OG-Fe(II) oxygenase family protein                            |
| AT5G67480                                 | TAZ zinc finger family protein                                                 |
| AT5G52450                                 | MATE efflux protein-related strong similarity to unknown protein (pir  T02324) |
| AT4G23680                                 | major latex protein-related                                                    |
| AT4G21900 /// AT4G21910                   | antiporter/ drug transporter                                                   |
| AT2G44200                                 | expressed protein                                                              |
| AT3G08690                                 | ubiquitin-conjugating enzyme 11 (UBC11) E2;                                    |
| AT4G16520                                 | autophagy 8f (APG8f)                                                           |
| AT5G18130                                 | expressed protein                                                              |
| AT1G24807 /// AT1G24909 /// AT1G25083 /// |                                                                                |
| AT1G25155 /// AT1G25220 /// AT5G57890     | anthranilate synthase beta subunit, putative                                   |
| AT3G50220                                 | expressed protein                                                              |
| AT5G24770 /// AT5G24780                   | vegetative storage protein 2 (VSP2)                                            |
| AT4G36830                                 | GNS1/SUR4 membrane family protein                                              |
| AT4G08770                                 | peroxidase, putative                                                           |
| AT2G33380                                 | calcium-binding RD20 protein (RD20)                                            |
| AT1G78210                                 | hydrolase, alpha                                                               |
| AT1G68470                                 | exostosin family protein                                                       |

|                         |                                                      |
|-------------------------|------------------------------------------------------|
| AT2G34930               | disease resistance family protein                    |
| AT5G15630               | phytochelatin synthetase family protein              |
| AT2G22560               | kinase interacting protein-related                   |
| AT5G41990               | protein kinase family protein                        |
| AT1G30135               | expressed protein                                    |
| AT1G62540               | flavin-containing monooxygenase family protein       |
| AT5G36220               | cytochrome P450 81D1 (CYP81D1) (CYP91A1)             |
| AT5G12340               | expressed protein                                    |
| AT4G33150               | lysine-ketoglutarate reductase                       |
| AT2G34500               | cytochrome P450 family protein                       |
| AT5G42650               | allene oxide synthase (AOS)                          |
| AT4G12490               | protease inhibitor                                   |
| AT1G52890               | no apical meristem (NAM) family protein              |
| AT2G22880               | VQ motif-containing protein                          |
| AT1G53885               | senescence-associated protein-related                |
| AT5G66420               | expressed protein                                    |
| AT1G24100               | UDP-glucosyl transferase family protein              |
| AT2G43530               | trypsin inhibitor, putative                          |
| AT1G62760               | invertase                                            |
| AT1G07750               | cupin family protein                                 |
| AT5G59440               | thymidylate kinase family protein                    |
| AT1G54100               | aldehyde dehydrogenase, putative                     |
| AT3G29970               | germination protein-related                          |
| AT4G27070 /// AT5G54810 | tryptophan synthase, beta subunit 2 (TSB2)           |
| AT4G39675               | expressed protein                                    |
| AT1G25500               | choline transporter-related                          |
| AT5G57150               | basic helix-loop-helix (bHLH) family protein         |
| AT1G19680               | expressed protein                                    |
| AT2G22330               | cytochrome P450, putative                            |
| AT4G12430               | trehalose-6-phosphate phosphatase, putative          |
| AT4G20860               | FAD-binding domain-containing protein                |
| AT2G23180               | cytochrome P450, putative                            |
| AT5G54390               | inositol monophosphatase family protein              |
| AT5G65870               | phytosulfokines 5 (PSK5)                             |
| AT2G30870               | glutathione S-transferase, putative                  |
| AT5G09980               | expressed protein                                    |
| AT3G19550               | expressed protein                                    |
| AT1G06620               | 2-oxoglutarate-dependent dioxygenase, putative       |
| AT2G43520               | trypsin inhibitor, putative                          |
| AT4G17615               | calcineurin B-like protein 1 (CBL1)                  |
| AT1G61800               | glucose-6-phosphate                                  |
| AT3G49620               | DIN11 (DARK INDUCIBLE 11)                            |
| AT2G30530               | expressed protein                                    |
| AT1G31710               | copper amine oxidase, putative                       |
| AT1G32640               | basic helix-loop-helix (bHLH) protein (RAP-1)        |
| AT1G29330               | ER lumen protein retaining receptor (ERD2)           |
| AT5G44030               | cellulose synthase, catalytic subunit (IRX5)         |
| AT1G61120               | terpene synthase                                     |
| AT5G47240               | MutT/nudix family protein                            |
| AT1G26665               | expressed protein                                    |
| AT5G67210               | expressed protein                                    |
| AT1G80110               | expressed protein                                    |
| AT5G16450               | dimethylmenaquinone methyltransferase family protein |
| AT2G29440               | glutathione S-transferase, putative                  |
| AT5G12010               | expressed protein                                    |
| AT4G37410               | cytochrome P450, putative                            |
| AT5G57340               | expressed protein                                    |
| AT3G27880               | expressed protein                                    |
| AT3G26200               | cytochrome P450 71B22, putative (CYP71B22)           |
| AT2G03980               | GDSL-motif lipase                                    |



|                         |                                                                    |
|-------------------------|--------------------------------------------------------------------|
| AT3G10250               | expressed protein                                                  |
| AT1G36280 /// AT4G18440 | adenylosuccinate lyase, putative                                   |
| AT5G16970               | NADP-dependent oxidoreductase, putative (P1)                       |
| AT5G54690               | glycosyl transferase family 8 protein                              |
| AT1G80820               | cinnamoyl-CoA reductase, putative                                  |
| AT2G39420               | esterase                                                           |
| AT4G36670               | mannitol transporter, putative                                     |
| AT5G66650               | expressed protein                                                  |
| AT3G16470               | jacalin lectin family protein                                      |
| AT3G60120               | glycosyl hydrolase family 1 protein                                |
| AT2G22860               | phytosulfokines 2 (PSK2)                                           |
| AT4G30530               | defense-related protein, putative                                  |
| AT3G59010               | pectinesterase family protein                                      |
| AT5G54170               | expressed protein                                                  |
| AT1G33030               | O-methyltransferase family 2 protein                               |
| AT3G51450               | strictosidine synthase family protein                              |
| AT3G16500               | auxin-responsive AUX                                               |
| AT1G72510 /// AT2G09970 | expressed protein                                                  |
| AT1G52410               | caldesmon-related                                                  |
| AT4G27860               | integral membrane family protein                                   |
| AT3G09940               | monodehydroascorbate reductase, putative                           |
| AT5G14700               | cinnamoyl-CoA reductase-related                                    |
| AT3G02550               | LOB domain protein 41                                              |
| AT5G41800               | amino acid transporter family protein                              |
| AT5G05340               | peroxidase, putative                                               |
| AT1G14130               | 2-oxoglutarate-dependent dioxygenase, putative                     |
| AT3G24954 /// AT3G24982 | leucine-rich repeat family protein                                 |
| AT3G15790               | methyl-CpG-binding domain-containing protein                       |
| AT3G48890               | cytochrome b5 domain-containing protein                            |
| AT4G11650               | osmotin-like protein (OSM34)                                       |
| AT5G05600               | oxidoreductase, 2OG-Fe(II) oxygenase family protein                |
| AT2G29460               | glutathione S-transferase, putative                                |
| AT3G16920               | glycoside hydrolase family 19 protein                              |
| AT4G10380               | major intrinsic family protein                                     |
| AT3G17810               | dihydroorotate dehydrogenase family protein                        |
| AT2G22770               | basic helix-loop-helix (bHLH) family protein                       |
| AT1G76650               | calcium-binding EF hand family protein                             |
| AT3G26820 /// AT3G26840 | esterase                                                           |
| AT1G03495 /// AT1G03940 | pseudogene, transferase family                                     |
| AT4G29700               | type I phosphodiesterase                                           |
| AT1G70830               | Bet v I allergen family protein similar to Csf-2                   |
| AT1G64360               | expressed protein                                                  |
| AT5G22630               | prephenate dehydratase family protein                              |
| AT1G66860               | expressed protein                                                  |
| AT1G19550 /// AT1G19570 | dehydroascorbate reductase, putative                               |
| AT4G22870 /// AT4G22880 | leucoanthocyanidin dioxygenase, putative                           |
| AT4G14090               | UDP-glucuronosyl                                                   |
| AT2G39030               | GCN5-related N-acetyltransferase (GNAT) family protein             |
| AT1G17420               | lipoxygenase, putative                                             |
| AT3G46660               | UDP-glucosyl transferase family protein                            |
| AT3G28270               | expressed protein                                                  |
| AT5G09440               | phosphate-responsive protein, putative                             |
| AT5G56760               | serine O-acetyltransferase (SAT-52)                                |
| AT4G15093               | catalytic LigB subunit of aromatic ring-opening dioxygenase family |
| AT4G14010               | rapid alkalization factor (RALF) family protein                    |
| AT4G11600               | glutathione peroxidase, putative                                   |
| AT3G25780               | allene oxide cyclase, putative                                     |
| AT1G72180               | leucine-rich repeat transmembrane protein kinase, putative         |
| AT3G12490               | cysteine protease inhibitor, putative                              |
| AT3G19660               | expressed protein                                                  |

|                                                         |                                                                        |
|---------------------------------------------------------|------------------------------------------------------------------------|
| AT5G54060                                               | glycosyltransferase family protein                                     |
| AT5G59730                                               | exocyst subunit EXO70 family protein leucine zipper-containing protein |
| AT2G22900                                               | galactosyl transferase GMA12                                           |
| <a href="#">AT4G16770</a>                               | <a href="#">oxidoreductase, 2OG-Fe(II) oxygenase family protein</a>    |
| AT2G34070                                               | expressed protein                                                      |
| AT2G36380                                               | ABC transporter family protein                                         |
| AT5G43460                                               | lesion inducing protein-related                                        |
| AT4G08870 /// AT4G08900                                 | arginase, putative                                                     |
| AT4G39980                                               | 2-dehydro-3-deoxyphosphoheptonate aldolase 1                           |
| AT2G06050                                               | 12-oxophytodienoate reductase (OPR3)                                   |
| AT1G52030 /// AT1G52040                                 | myrosinase-binding protein, putative (F-ATMBP)                         |
| AT1G63010                                               | SPX (SYG1/Pho81/XPR1) domain-containing protein                        |
| AT1G19610                                               | plant defensin-fusion protein, putative (PDF1.4)                       |
| AT1G22480                                               | plastocyanin-like domain-containing protein                            |
| AT5G38710                                               | proline oxidase, putative                                              |
| AT4G23600                                               | coronatine-responsive tyrosine aminotransferase                        |
| AT1G73330                                               | protease inhibitor, putative (DR4)                                     |
| AT1G03080                                               | kinase interacting family protein                                      |
| AT4G01390                                               | mepirin and TRAF homology domain-containing protein                    |
| AT1G65890                                               | acyl-activating enzyme 12 (AAE12)                                      |
| AT5G59305                                               | expressed protein                                                      |
| AT5G54300                                               | expressed protein                                                      |
| AT3G47750 /// AT3G47760                                 | ABC transporter family protein                                         |
| AT1G61610                                               | S-locus lectin protein kinase family protein                           |
| AT1G66370                                               | myb family transcription factor (MYB113)                               |
| <a href="#">AT4G34050</a>                               | <a href="#">caffeoyl-CoA 3-O-methyltransferase, putative</a>           |
| AT4G27652                                               | expressed protein                                                      |
| AT2G15760                                               | calmodulin-binding protein                                             |
| AT1G72260                                               | thionin (THI2.1)                                                       |
| AT3G62960                                               | glutaredoxin family protein                                            |
| AT1G14120                                               | 2-oxoglutarate-dependent dioxygenase, putative                         |
| AT5G44380                                               | FAD-binding domain-containing protein                                  |
| AT3G05690                                               | CCAAT-binding transcription factor (CBF-B)                             |
| AT5G55120                                               | expressed protein                                                      |
| AT5G19440                                               | cinnamyl-alcohol dehydrogenase, putative (CAD)                         |
| AT5G09620                                               | octicosapeptide                                                        |
| AT1G69870                                               | proton-dependent oligopeptide transport (POT) family protein           |
| AT4G37710                                               | VQ motif-containing protein                                            |
| AT5G24290                                               | integral membrane family protein                                       |
| AT4G21850                                               | methionine sulfoxide reductase domain-containing protein               |
| AT3G16390 /// AT3G16400 /// AT3G16410                   | jacalin lectin family protein                                          |
| AT1G17745                                               | D-3-phosphoglycerate dehydrogenase                                     |
| AT3G09260                                               | glycosyl hydrolase family 1 protein                                    |
| AT4G35110                                               | expressed protein                                                      |
| AT3G16420 /// AT3G16430                                 | jacalin lectin family protein                                          |
| <a href="#">AT5G15960</a> /// <a href="#">AT5G15970</a> | <a href="#">stress-responsive protein (KIN1)</a>                       |
| <a href="#">AT5G47910</a>                               | <a href="#">respiratory burst oxidase protein D (RbohD)</a>            |
| AT3G28220                                               | mepirin and TRAF homology domain-containing protein                    |
| AT4G38540                                               | monooxygenase, putative (MO2)                                          |
| AT5G24760                                               | alcohol dehydrogenase, putative                                        |
| AT5G24160                                               | squalene monooxygenase 1,2                                             |
| AT3G01970                                               | WRKY family transcription factor                                       |
| AT4G35060                                               | heavy-metal-associated domain-containing protein                       |
| AT1G72450                                               | expressed protein                                                      |
| AT3G17820                                               | glutamine synthetase (GS1)                                             |
| AT1G19640                                               | S-adenosyl-L-methionine:jasmonic acid carboxyl methyltransferase (JMT) |
| AT1G69480                                               | EXS family protein                                                     |
| AT1G23850                                               | expressed protein                                                      |
| AT4G12040                                               | zinc finger (AN1-like) family protein                                  |
| <a href="#">AT3G25570</a>                               | <a href="#">adenosylmethionine decarboxylase family protein</a>        |

|                         |                                                            |
|-------------------------|------------------------------------------------------------|
| AT2G22240               | inositol-3-phosphate synthase isozyme 2                    |
| AT3G16460               | jacalin lectin family protein                              |
| AT5G65600               | legume lectin family protein                               |
| AT1G18710               | myb family transcription factor (MYB47)                    |
| AT3G52870               | calmodulin-binding family protein                          |
| AT3G25760 /// AT3G25770 | early-responsive to dehydration stress protein (ERD12)     |
| AT2G39770               | GDP-mannose pyrophosphorylase (GMP1)                       |
| AT3G16450               | jacalin lectin family protein                              |
| AT2G32150               | haloacid dehalogenase-like hydrolase family protein        |
| AT2G30490               | trans-cinnamate 4-monooxygenase                            |
| AT1G51760 /// AT1G51780 | IAA-amino acid hydrolase 3                                 |
| AT3G45140               | lipoxygenase (LOX2)                                        |
| AT1G28680               | transferase family protein                                 |
| AT2G34810               | FAD-binding domain-containing protein                      |
| AT2G43510               | trypsin inhibitor, putative                                |
| AT3G15950               | DNA topoisomerase-related                                  |
| AT2G39330               | jacalin lectin family protein                              |
| AT1G78490               | cytochrome P450 family protein                             |
| AT5G13800               | hydrolase, alpha                                           |
| AT4G39270               | leucine-rich repeat transmembrane protein kinase, putative |
| AT1G56650               | myb family transcription factor (MYB75)                    |

---
